# Supplementary material
Source: PubMed Central journal article supplement (PMC5967763)
Supplement: ASN.2017050545SupplementaryData1.pdf [file ASN.2017050545SupplementaryData1.pdf]

## ***Supplemental Data***

**Supplemental Figure 1.** General feature of ATAC-Seq analysis.

**Supplemental Figure 2.** Calculated 'Open probability ( $P_o$ )' for regulatory regions within insulated loops.

**Supplemental Figure 3.** Changes of complement of minimum Bayes' factor (MBF) upon different noise values within the *Faim2-Aqp2-Aqp5* insulated loop.

**Supplemental Figure 4.** Expression of CREB and C/EBP $\beta$  in the nucleus of mpkCCD cells.

**Supplemental Figure 5.** Complement of minimum Bayes' factor (MBF) from ChIP-Seq for C/EBP $\beta$  within the *Faim2-Aqp2-Aqp5* insulated loop.

**Supplemental Figure 6.** Interactive network of genes (transcription factors, kinases and transporters) with C/EBP $\beta$ -binding sites on their promoter or gene body.

**Supplemental Figure 7.** Classification of genes with CREB- and C/EBP $\beta$ -binding sites by expressional pattern and promoter types.

**Supplemental Figure 8.** Interactive network of genes (transcription factors, kinases and transporters) with CREB-binding sites on their promoter or gene body.

**Supplemental Table 1.** Functional annotations of C/EBP $\beta$ -bound genes

**Supplemental Table 2.** Vasopressin-mediated regulation of genes with C/EBP $\beta$ -binding sites

**Supplemental Table 3.** Functional annotations of CREB-bound genes

**Supplemental Table 4.** Vasopressin-mediated regulation of genes with CREB-binding sites

**Supplemental Dataset 1.** Transcription factors expressed in mpkCCD cells

**Full Methods**

# Supplemental Figure 1

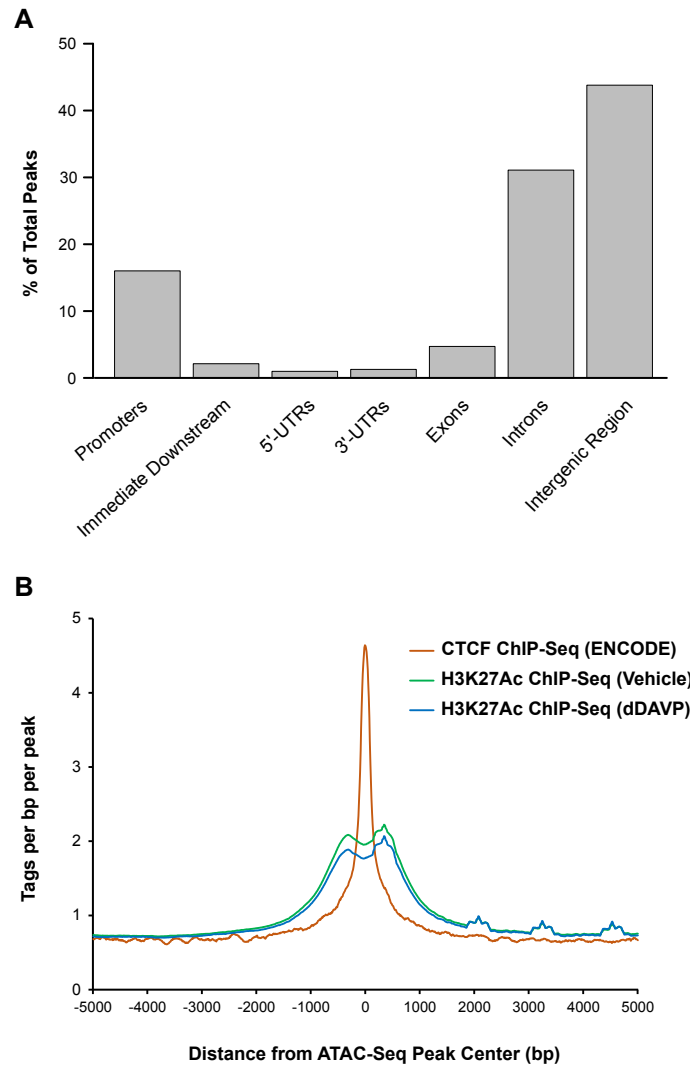

**Supplemental Figure 1.** *General feature of ATAC-Seq analysis.* (A) Locations of ATAC-Seq peaks relative to nearest gene. The majority of ATAC-Seq peaks were found within the introns of genes and intergenic regions. (B) Histogram of the distribution of ChIP-Seq signals (CTCF ChIP-Seq and H3K27Ac ChIP-Seq) near ATAC-Seq peaks. Signals from ChIP-Seq were evaluated within 5 kb upstream to 5 kb downstream of ATAC-Seq peak center was calculated using *HOMER*.

## Supplemental Figure 2

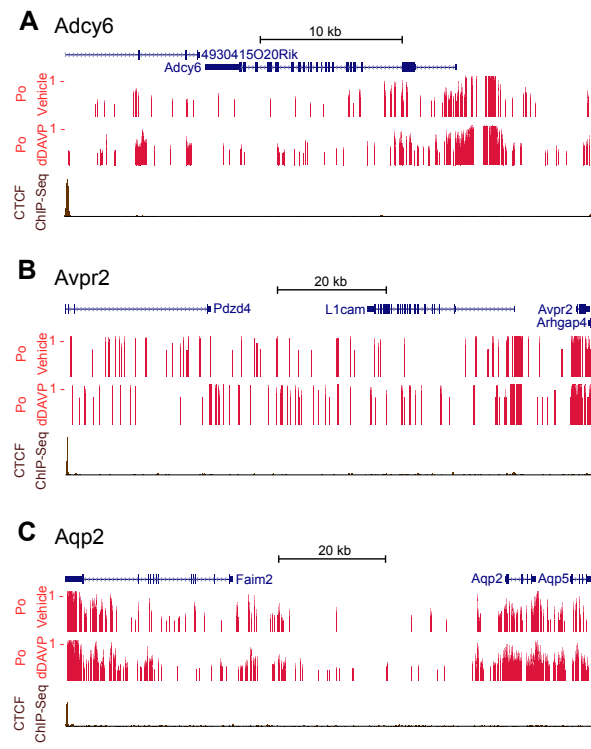

**Supplemental Figure 2.** *Calculated 'Open probability ( $P_o$ )' for regulatory regions within insulated loops. (A) CTCF loop including *Adcy6* gene. (B) CTCF loop including *Avpr2* gene. (C) CTCF loop including *Aqp2* gene. The  $P_o$  values were calculated using 1x Median value as a noise value.*

# Supplemental Figure 3

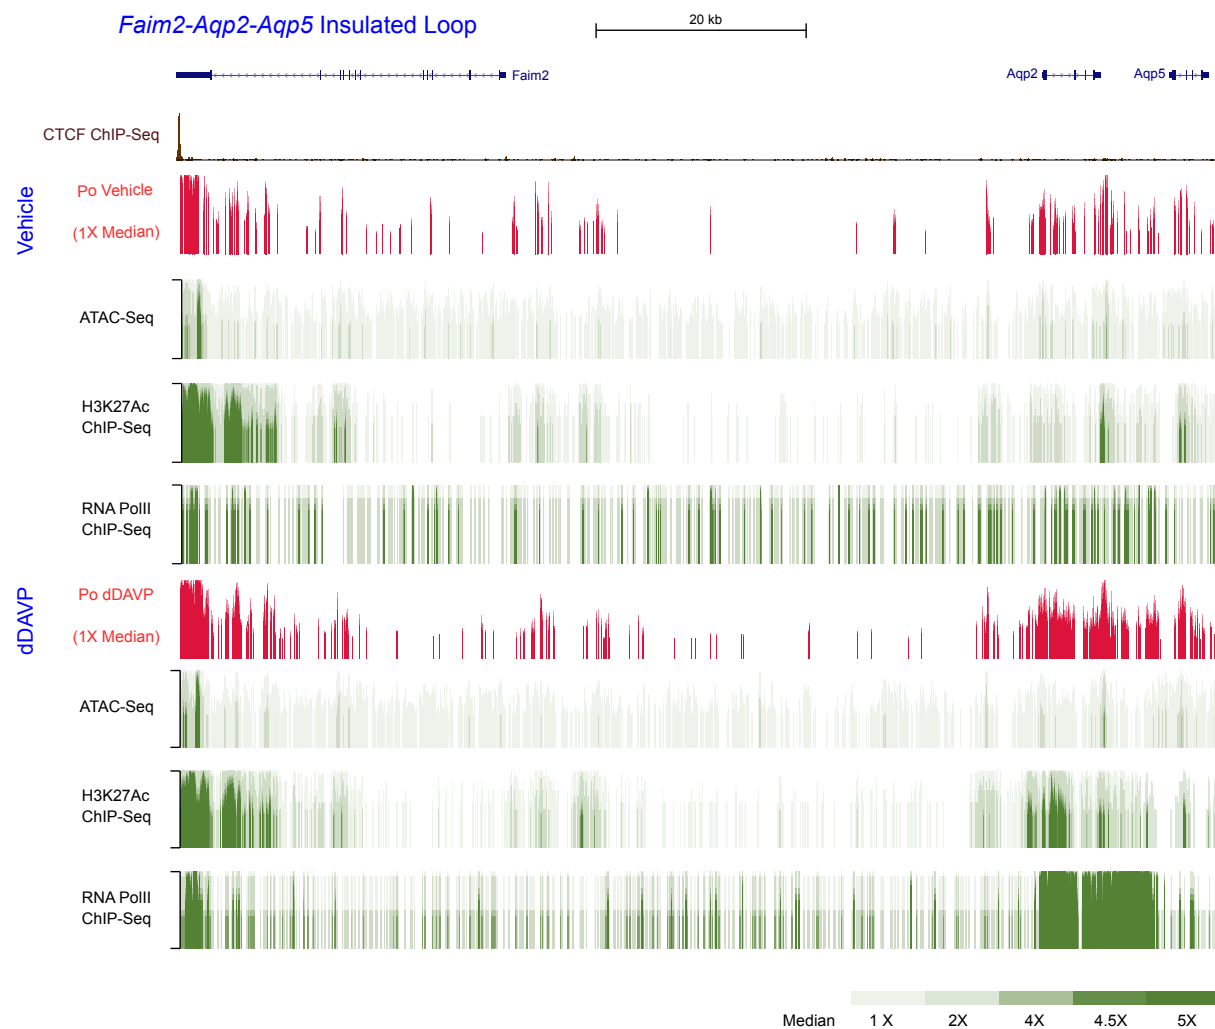

**Supplemental Figure 3.** *Changes of complement of minimum Bayes' factor (MBF) upon different noise values within the Faim2-Aqp2-Aqp5 insulated loop.* Open probability ( $P_o$ ) by multiplying 3 independent MBF complements were shown as the complement of the MBF in red plots. MBF changes of each experiment by multiple tests using different noise values (1X-5X median) were shown in individual plots (green plots). "Complement of MBF" is  $1 - \text{MBF}$

# Supplemental Figure 4

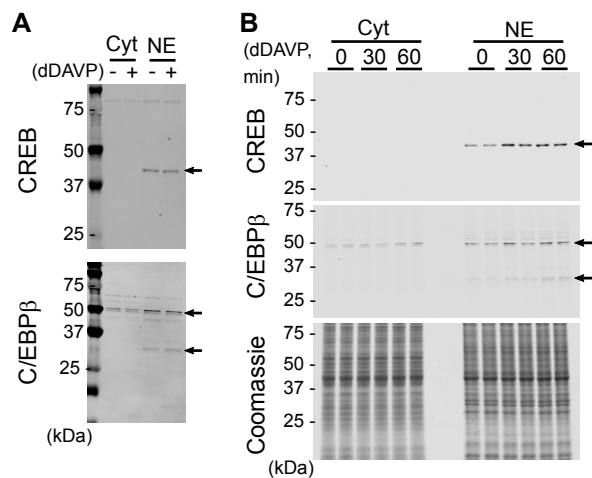



**Supplemental Figure 4.** *Expression of CREB and C/EBP $\beta$  in the nucleus of mpkCCD cells.*

Two fractions, cytosolic extract (Cyt) and nuclear extract (NE), were obtained from the mpkCCD cells cultured on the permeable filters. (A) Protein expression of CREB and C/EBP $\beta$  in cytosolic and nuclear extracts isolated from mpkCCD cells incubated with 0.1 nM dDAVP or vehicle for 24 h. (B) Protein expression of CREB and C/EBP $\beta$  in cytosolic and nuclear extracts by short-term response to 0.1 nM dDAVP or vehicle (30 and 60 min). Molecular weight of CREB is 37 kDa; molecular weights of two isoforms of C/EBP $\beta$  are 38 kDa (liver activating protein, LAP) and 20 kDa (liver inhibitory protein, LIP).

# Supplemental Figure 5

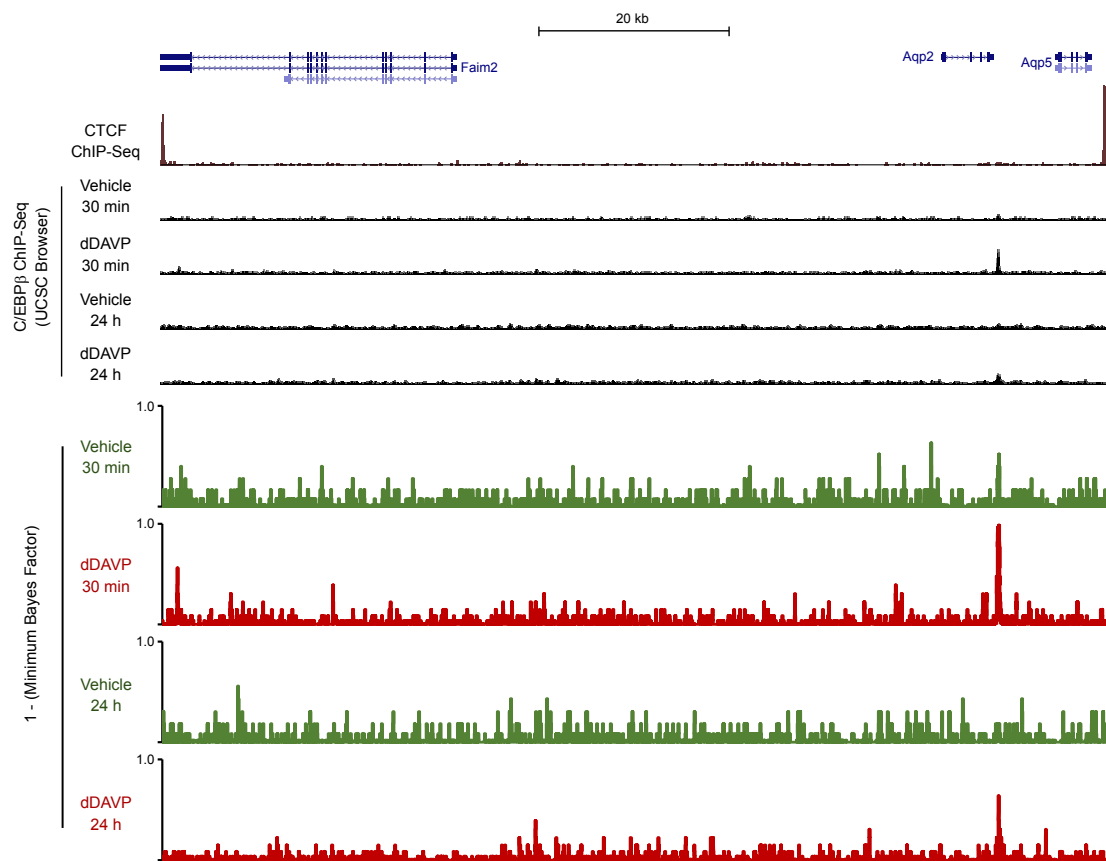

**Supplemental Figure 5.** *Complement of minimum Bayes' factor (MBF) from read distribution of ChIP-Seq for C/EBP $\beta$  within the Faim2-Aqp2-Aqp5 insulated loop.* Tracks for CTCF ChIP-Seq and C/EBP $\beta$  ChIP-Seq on the UCSC genome browser show read distribution from ChIP-Seq analysis in mpkCCD cells (30 min and 24 h treatment of dDAVP or vehicle). Minimum Bayes' factor (MBF) calculated from the signal-to-noise ratio were shown as the complement of the MBF in next four plots. Noise values for this calculation were estimated as 7 times the median read density value across the loop.

# Supplemental Figure 6

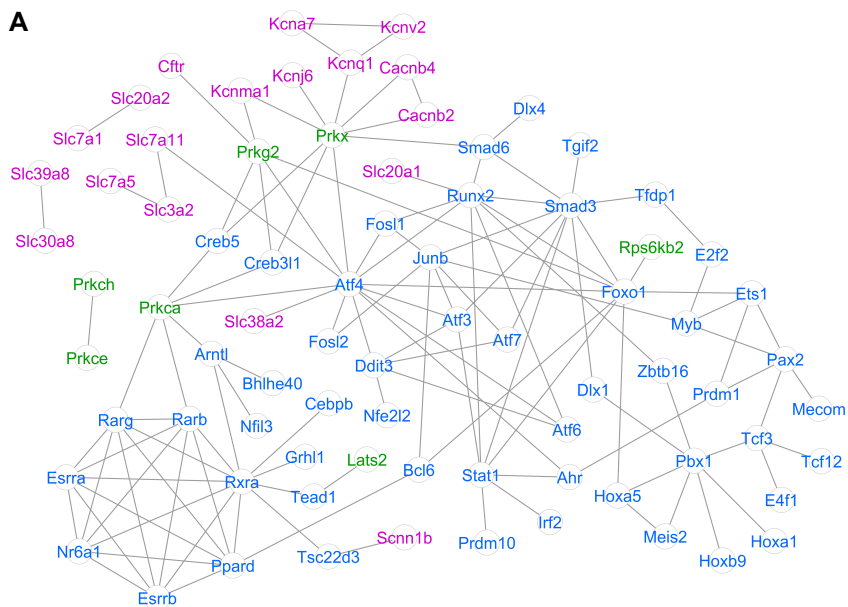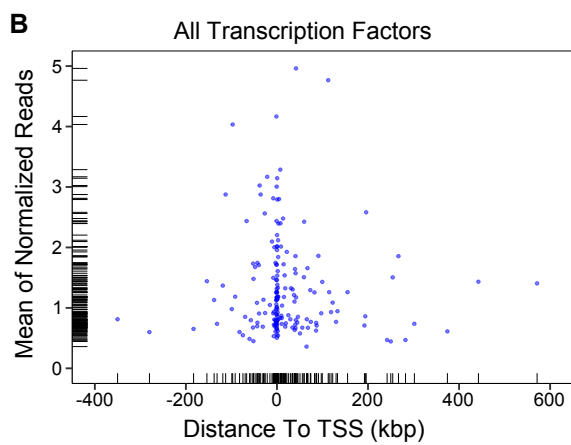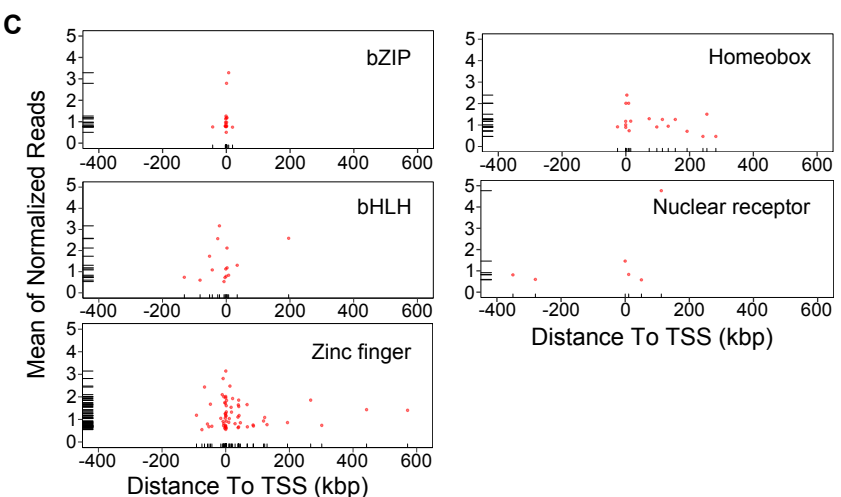

**Supplemental Figure 6.** *Interactive network of genes (transcription factors, kinases and transporters) with C/EBP $\beta$ -binding sites on their promoter or gene body.* (A) Interactive network of genes (transcription factors, kinases and transporters). The network was based on String (10.0) database and generated using Cytoscape (3.4). Yellow nodes were genes that have over 3 connections. (B) Plots for C/EBP $\beta$ -binding location (distance to transcription start site) and ChIP-Seq signal (the normalized read count) in C/EBP $\beta$ -bound transcription factor genes in dDAVP-treated cells. (C) Plots for C/EBP $\beta$ -bound transcription factor genes of four transcription factor family among total C/EBP $\beta$ -bound transcription factor genes identified from ChIP-Seq of dDAVP-treated cells.

# Supplemental Figure 7

**A**

Chi-square statistic analysis

|             | CREB ChIP-Seq           |             | C/EBP $\beta$ ChIP-Seq   |              | RNA-Seq in mpkCCD                |
|-------------|-------------------------|-------------|--------------------------|--------------|----------------------------------|
|             | Gene number (973 genes) | Chi-square  | Gene number (1575 genes) | Chi-square   | Whole transcriptome (8393 genes) |
| HK          | 112/973                 | 0.68        | 106/1575                 | <b>42.20</b> | 1043/8393                        |
| CD-specific | 5/973                   | 3.61        | 44/1575                  | <b>23.40</b> | 101/8393                         |
| CpG         | 464/973                 | <b>6.49</b> | 583/1575                 | <b>22.17</b> | 3643/8393                        |
| TATA        | 9/973                   | 0.93        | 34/1575                  | <b>7.18</b>  | 108/8393                         |
| Both        | 6/973                   | 0.02        | 7/1575                   | 0.95         | 55/8393                          |

**B**

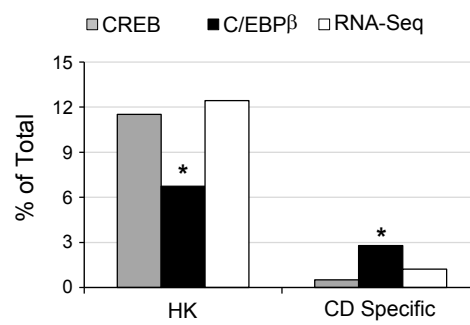

**C**

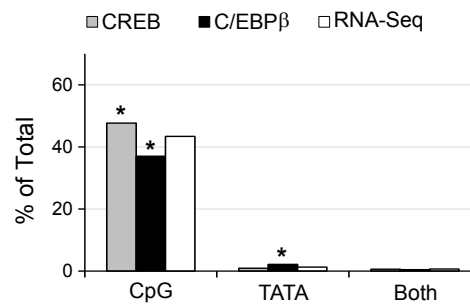

**Supplemental Figure 7.** *Classification of genes with CREB- and C/EBP $\beta$ -binding sites by expressional pattern and promoter types.* (A) Statistical analysis using *Chi-square*. (B) Genes with CREB- and C/EBP $\beta$ -binding sites that express ubiquitously ('housekeeping (HK) genes') or specifically ('Collecting duct (CD) specific genes') across the microdissected tubules of rat kidney from prior RNA-Seq dataset<sup>1</sup> were identified. Transcription factors may play roles in specifying cell-type-specific gene expression, e.g. the *Aqp2* gene in renal collecting duct principal cells. Alternatively, they may be general determinants of cell function by specifying expression of so-called "housekeeping" genes. Housekeeping genes were less frequent among genes with C/EBP $\beta$ -binding sites than for the mpkCCD transcriptome in general, while collecting duct-specific genes were more frequent among genes with C/EBP $\beta$ -binding sites. This suggests a possible role for C/EBP $\beta$  in collecting duct-specific gene expression beyond the *Aqp2* gene. Additional collecting duct-specific genes that have C/EBP $\beta$ -binding sites include an aldosterone-regulated membrane protein (*Fxyd4*), a membrane-spanning glycoprotein (*Muc20*), a small GTP-binding protein (*Rab15*), an AP2 transcription factor (*Tfap2a*), a TGF- $\beta$  regulated transcription factor (*Tgif2*) and a sodium-bile acid cotransporter (*Slc10a7*). All of these sites are intronic and are increased by dDAVP treatment. In contrast, the frequency of housekeeping and collecting duct-specific genes among genes with CREB-binding sites was not different from that of the general transcriptome. (C) Genes with CREB- and C/EBP $\beta$ -binding sites with different core promoter types were identified. Core promoters were classified as promoters containing CpG, TATA-box, either and neither (others) of CpG and TATA-box. Another way to classify genes is based on whether they possess CpG islands or TATA boxes in their promoter proximal regions. Tissue-specific genes tend to possess TATA boxes, while housekeeping genes tend to have promoter-proximal CpG islands. Among genes with CREB-binding sites, a greater fraction have CpG islands than among the all expressed genes in mpkCCD cells. Conversely, among genes with C/EBP $\beta$ -binding sites, a smaller fraction have CpG islands than

among the expressed genes. In contrast, genes with TATA boxes are more frequent among genes with C/EBP $\beta$ -binding sites than among all expressed genes. These observations further support the potential role of C/EBP $\beta$  in cell-specific gene expression in collecting duct principal cells. Significance ( $p < 0.05$ ) of distribution was tested by comparing distribution of total genes identified from prior RNA-Seq of mpkCCD cells using the Fisher exact test. \*:  $p < 0.05$ .



# Supplemental Figure 8

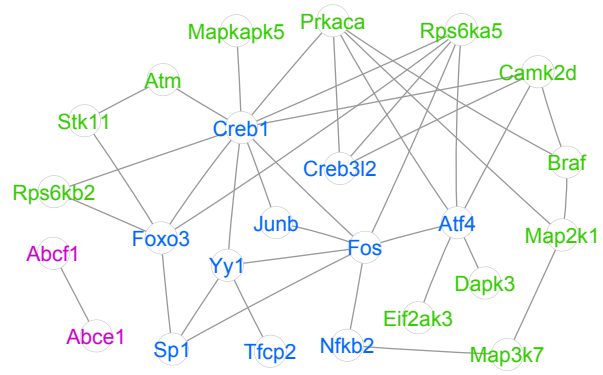

**Supplemental Figure 8.** *Interactive network of genes (transcription factors, kinases and transporters) with CREB-binding sites on their promoter or gene body.* The network was based on *String* (10.0) database and generated using *Cytoscape* (3.4).

**Supplemental Table 1. Functional annotations of C/EBP $\beta$ -bound genes\***

| Location  | Function             | Family (no. of genes)                                                                                                        | Genes                                                                                                                                                                                                                                  |
|-----------|----------------------|------------------------------------------------------------------------------------------------------------------------------|----------------------------------------------------------------------------------------------------------------------------------------------------------------------------------------------------------------------------------------|
| Promoter  | Transcription Factor | zf-C2H2 (26)                                                                                                                 | <i>Bcl6, Zbtb16, Zbtb20, Zbtb38, Al987944, Bnc2, E4f1, Glis3, Hivep1, Hivep2, Klf11, Klf13, Klf3, Mecom, Plagl1, Prdm1, Prdm10, Rreb1, Zfp212, Zfp217, Zfp236, Zfp553, Zfp618, Zfp672, Zfp707, Zfpm2, L3mbtl1, Myt1l, Litaf, Zmiz1</i> |
|           |                      | Homeo-box (12)                                                                                                               | <i>Cers2, Cphx2, Dlx1, Duxbl2, Hmbox1, Hoxa3, Hoxa5, Meis2, Pbx1, Tgif2, Zfhx3, Pou2f3</i>                                                                                                                                             |
|           |                      | bZIP (10)                                                                                                                    | <i>Atf3, Atf4, Atf7, Cebpb, Creb3l1, Fosl2, Nfe2l1, Nfe2l2, Nfil3, Tsc22d3</i>                                                                                                                                                         |
|           |                      | bHLH (7)                                                                                                                     | <i>Ahr, Arntl, Bhlhe40, Figla, Mnt, Mxi1, Tcf12</i>                                                                                                                                                                                    |
|           |                      | ETS (3)                                                                                                                      | <i>Ehf, Elf1, Ets1</i>                                                                                                                                                                                                                 |
|           |                      | THR-like (3)                                                                                                                 | <i>Ppard, Rarb, Rarg</i>                                                                                                                                                                                                               |
|           |                      | zf-C2HC (2), Ig-fold (2), MH1 (2), E2F (2), ARID (2), CSD (2)                                                                | <i>Arid1b, Jarid2, Csde1, Ybx3, E2f2, Tfdp1, Foxo1, Foxp1, Smad3, Smad6</i>                                                                                                                                                            |
|           |                      | HMG, IRF, AP-2, CP2, MBD, Tub, MYB, PAX, TEA, AF-4, ESR-like, CTF/NFI, CG-1, zf-MIZ, zf-LITAF-like, GCNF-like, RXR-like (17) | <i>Aff1, Tfp2a, Camta1, Grhl1, Nfix, Esrrb, Nr6a1, Bbx, Irf2, Baz2b, Myb, Trp63, Pax2, Runx2, Rxra, Tead1, Tulp4, Litaf, Zmiz1</i>                                                                                                     |
|           | Kinase               | AGC (3)                                                                                                                      | <i>Prkx, Rps6kb2</i>                                                                                                                                                                                                                   |
|           | Transporter          | SLC (8)                                                                                                                      | <i>Slc13a2, Slc20a1, Slc25a1, Slc25a27, Slc25a39, Slc33a1, Slc35e3, Slc7a11</i>                                                                                                                                                        |
|           |                      | ABC (3)                                                                                                                      | <i>Abcb1b, Abcc3, Abcd3</i>                                                                                                                                                                                                            |
|           |                      | CLC (2)                                                                                                                      | <i>Clcn3, Clcn6</i>                                                                                                                                                                                                                    |
|           |                      | CLAUDIN, KCN, MPC, SFXN, TPC, V-ATPase (6)                                                                                   | <i>Cldn8, Kcnk13, Mpc2, Sfxn3, Tpcn1, Tcirg1</i>                                                                                                                                                                                       |
| Gene Body | Transcription Factor | zf-C2H2 (7)                                                                                                                  | <i>Mynn, Zbtb44, Zbtb48, Zfp1, Zfp266, Zfp809, 2610008E11Rik</i>                                                                                                                                                                       |
|           |                      | bZIP (6)                                                                                                                     | <i>Atf6, Atf7, Creb5, Ddit3, Fosl1, Junb</i>                                                                                                                                                                                           |
|           |                      | Homeobox (4)                                                                                                                 | <i>Dlx4, Hlx, Hoxa1, Hoxb9</i>                                                                                                                                                                                                         |
|           |                      | bHLH (2)                                                                                                                     | <i>Mnt, Tcf3</i>                                                                                                                                                                                                                       |
|           |                      | HMG, CP2, ARID, ETS, IRF, Ig-fold, ESR-like, zf-C2HC, zf-BED (9)                                                             | <i>Hmgxb3, Arid4a, Ehf, Kat7, Grhl2, Esrra, Stat1, Irf2, 2700081O15Rik</i>                                                                                                                                                             |
|           | Kinase               | AGC (7)                                                                                                                      | <i>Cdc42bpb, Lats2, Mast4, Prkca, Prkce, Prkch, Prkg2</i>                                                                                                                                                                              |
|           | Transporter          | SLC (23)                                                                                                                     | <i>Slc10a7, Slc12a3, Slc12a8, Slc15a3, Slc16a12, Slc17a5, Slc1a4, Slc20a2, Slc22a23, Slc25a25, Slc25a27, Slc2a1, Slc30a8, Slc38a2, Slc38a7, Slc39a8, Slc3a2, Slc43a2, Slc44a3, Slc7a1, Slc7a15, Slc7a15, Slc7a5</i>                    |
|           |                      | KCN (6)                                                                                                                      | <i>Kcna7, Kcnj6, Kcnk1, Kcnma1, Kcnq1, Kcnv2</i>                                                                                                                                                                                       |
| ABC (5)   |                      | <i>Abca4, Abcc4, Abcc5, Abcf2, Cftr</i>                                                                                      |                                                                                                                                                                                                                                        |

|  |  |                                                            |                                                                    |
|--|--|------------------------------------------------------------|--------------------------------------------------------------------|
|  |  | CACN (2)                                                   | <i>Cacnb2, Cacnb4</i>                                              |
|  |  | CLC, CLIC,<br>CONNEXIN, ENAC,<br>RH, SCN, SLCO, TRP<br>(8) | <i>Clcn3, Clic6, Gjb3, Scnn1b, Rhbg, Scn9a,<br/>Slco6b1, Trpv3</i> |

\* C/EBP $\beta$ -enriched peaks obtained from C/EBP $\beta$  CHIP-Seq were mapped to genes using an R package *ChIPpeakAnno* (version 3.2.2). Function of genes was identified by mapping gene symbols to annotated lists of transcription factors

(<https://hpcwebapps.cit.nih.gov/ESBL/Database/TranscriptionFactors/>), protein kinases

(<https://hpcwebapps.cit.nih.gov/ESBL/Database/Kinases/>) and transporters

([https://hpcwebapps.cit.nih.gov/ESBL/Database/NephronRNAseq/Transporters\\_and\\_Channels.html](https://hpcwebapps.cit.nih.gov/ESBL/Database/NephronRNAseq/Transporters_and_Channels.html)).

**Supplemental Table 2.** Vasopressin-mediated regulation of genes with C/EBP $\beta$ -binding sites

| <b>Gene<br/>Symbol</b> | <b>Response to vasopressin</b> |                        |                  | <b>References<br/>( ): PMID</b>                                                                     |
|------------------------|--------------------------------|------------------------|------------------|-----------------------------------------------------------------------------------------------------|
|                        | <b>Expression</b>              | <b>Phosphorylation</b> | <b>Half-life</b> |                                                                                                     |
| Atf3                   | Increased                      |                        |                  | Cai et al. 2007 (17913837)                                                                          |
| Atf4                   | Increased                      |                        |                  | Cai et al. 2010 (20668095)                                                                          |
| Ddit3                  | Increased                      |                        |                  | Cai et al. 2010 (20668095)                                                                          |
| Junb                   | Increased                      |                        |                  | Sandoval et al. 2013 (24029424)                                                                     |
| Scnn1b                 | Increased                      |                        |                  | Ecelbarger et al. 2000 (10894786)<br>Brooks et al. 2003 (12388413)<br>Djelidi et al. 1997 (9407070) |
| Fosl1                  |                                |                        | Decreased        | Sandoval et al. 2013 (24029424)                                                                     |
| Cebpb                  |                                |                        | Increased        | Sandoval et al. 2013 (24029424)                                                                     |
| Prkca                  |                                |                        | Increased        | Sandoval et al. 2013 (24029424)                                                                     |
| Rps6kb2                |                                |                        | Increased        | Sandoval et al. 2013 (24029424)                                                                     |

**Supplemental Table 3.** Functional annotations of CREB-bound genes\*

| Location  | Function             | Family (no. of genes)                       | Genes                                                                                               |
|-----------|----------------------|---------------------------------------------|-----------------------------------------------------------------------------------------------------|
| Promoter  | Transcription Factor | zf-C2H2 (13)                                | <i>Hinfp, Rlf, Sp1, Yy1, Zbtb11, Zfp142, Zfp143, Zfp410, Zfp523, Zfp661, Zfp672, Zfp738, Zfp869</i> |
|           |                      | bZIP (6)                                    | <i>Atf4, Creb1, Creb3l2, Fos, Junb, Mafk</i>                                                        |
|           |                      | RFX (3)                                     | <i>Rfx1, Rfx3, Rfx5</i>                                                                             |
|           |                      | HMG (2)                                     | <i>Hmg20b, Wdhd1</i>                                                                                |
|           |                      | Forkhead, bHLH, CP2, MYB, zf-NF-X1, RHD (6) | <i>Tcf3, Tfc2, Foxo3, Nfkb2, Nfx1, Cdc5l</i>                                                        |
|           | Protein Kinase       | CAMK (6)                                    | <i>Camk2d, Dapk3, Mapkapk5, Mark3, Pskh1, Stk11</i>                                                 |
|           |                      | STE (4)                                     | <i>Map2k1, Map3k7, Map3k12, Oxsr1</i>                                                               |
|           |                      | Atypical (3)                                | <i>Adck5, Atm, Riok2</i>                                                                            |
|           |                      | CMGC (2)                                    | <i>Cdk11b, Clk4</i>                                                                                 |
|           |                      | AGC (2)                                     | <i>Prkaca, Rps6kb2</i>                                                                              |
|           |                      | CK1,TKL,NEK (3)                             | <i>Csnk1g2, Braf, Nek1</i>                                                                          |
|           |                      | Not classified (5)                          | <i>Eif2ak3, Plk2, Stk16, Tbck, Tex14</i>                                                            |
|           | Transporter          | SLC (7)                                     | <i>Slc25a3, Slc25a16, Slc25a28, Slc35b1, Slc35e1, Slc35e1, Slc35f5, Slc38a6</i>                     |
|           |                      | ABC (4)                                     | <i>Abce1, Abcf1, Abcf2, Tap1</i>                                                                    |
|           |                      | CLC (1)                                     | <i>Clcn3</i>                                                                                        |
| Gene Body | Transcription Factor | zf-C2H2 (9)                                 | <i>Mynn, Rlf, Zbtb21, Zfp335, Zfp65, Zfp868, Zfp869, Zfp874b, Zfp963</i>                            |
|           |                      | HMG (2)                                     | <i>Hbp1, Tox4</i>                                                                                   |
|           |                      | bHLH, GCNF-like (2)                         | <i>Mxi1, Nr6a1</i>                                                                                  |
|           | Protein Kinase       | AGC (3)                                     | <i>Mastl, Rps6ka5, Rps6kb2</i>                                                                      |
|           |                      | STE (1)                                     | <i>Map3k11</i>                                                                                      |
|           |                      | Not classified (1)                          | <i>Gak</i>                                                                                          |

\*CREB-enriched peaks obtained from CREB ChIP-Seq were mapped to genes using an R package *ChIPpeakAnno* (version 3.2.2). Function of genes was identified by mapping gene symbols to annotated lists of TFs (<https://hpcwebapps.cit.nih.gov/ESBL/Database/TranscriptionFactors/>), protein kinases (<https://hpcwebapps.cit.nih.gov/ESBL/Database/Kinases/>) and transporters ([https://hpcwebapps.cit.nih.gov/ESBL/Database/NephronRNAseq/Transporters and Channels.html](https://hpcwebapps.cit.nih.gov/ESBL/Database/NephronRNAseq/Transporters_and_Channels.html)).

**Supplemental Table 4.** Vasopressin-mediated regulation of genes with CREB-binding sites

| <b>Gene<br/>Symbol</b> | <b>Response to vasopressin</b> |                        |                  | <b>Reference<br/>( ): PMID</b>                                     |
|------------------------|--------------------------------|------------------------|------------------|--------------------------------------------------------------------|
|                        | <b>Expression</b>              | <b>Phosphorylation</b> | <b>Half-life</b> |                                                                    |
| Abce1                  | Increased                      |                        | Not changed      | Cai et al. 2007 (17913837)<br>Sandoval et al. 2013 (24029424)      |
| Atf4                   | Increased                      |                        |                  | Cai et al. 2010 (20668095)                                         |
| Fos                    | Increased                      |                        |                  | Brooks et al. 2003 (12388413)                                      |
| Junb                   | Increased                      |                        |                  | Schenk et al. 2012 (22440904)                                      |
| Camk2d                 |                                | Increased              |                  | Rinschen et al. 2010 (20139300)                                    |
| Creb1                  |                                | Increased              |                  | Rinschen et al. 2010 (20139300)                                    |
| Map3k7                 |                                | Increased              |                  | Hoffert et al. 2012 (22108457)                                     |
| Abcf1                  |                                | Decreased              | Not changed      | Hoffert et al. 2012 (22108457)<br>Sandoval et al. 2013 (24029424)  |
| Map2k1                 |                                | Decreased              | Increased        | Pisitkun et al. 2008 (18667481)<br>Sandoval et al. 2013 (24029424) |
| Atm                    |                                |                        | Increased        | Sandoval et al. 2013 (24029424)                                    |
| Rps6kb2                |                                |                        | Increased        | Sandoval et al. 2013 (24029424)                                    |
| Sp1                    |                                |                        | Decreased        | Sandoval et al. 2013 (24029424)                                    |

## Full Methods

*Cell culture.* AQP2-expressing mpkCCD clone 11 (mpkCCD) cells (passage number: 7-12) were grown in complete medium, DMEM/F-12 containing 2% fetal bovine serum and other supplements (5 µg/mL insulin, 50 nM dexamethasone, 1 nM triiodothyronine, 10 ng/mL epidermal growth factor, 60 nM sodium selenite, 5 µg/mL transferrin, all from Sigma) on permeable membrane supports (0.4 µm pore size, Transwell, 3419 or 3450, Corning) as described.<sup>1</sup> The polarization of cells was determined by transepithelial resistance measurements using the Epithelial Volt ohmmeter (WPI). The polarized cells were incubated for 24h in the serum- and hormone-free medium, DMEM/F12 containing 60 nM sodium selenite, and 5µg/mL transferrin, and then were exposed to [deamino-Cys1, D-Arg8]-Vasopressin (dDAVP, 0.1 nM times indicated in text) or vehicle at the basolateral side.

*Preparation of nuclear and cytoplasmic fractions.* Nuclear and cytosolic fractions were isolated from mpkCCD cells using NE-PER Nuclear and Cytoplasmic Extraction Reagent Kit (Pierce, Rockfort, IL).<sup>2</sup> Briefly, the cells were washed with cold PBS and collected in cold PBS using a cell scraper. The cell pellet was obtained by centrifugation (500×g for 5 min at 4°C) and resuspended in 200 µL of buffer 1 containing a protease and phosphatase inhibitor cocktail (Halt™ Protease and Phosphatase Inhibitor Cocktail, Pierce) followed by addition of buffer 2. After incubation on ice, the nuclear fraction was isolated by centrifugation (17,000×g for 5 min at 4°C), and the supernatant (cytoplasmic extract) was stored at -80°C. The pellets were resuspended in 100 µL of buffer 3 containing protease and phosphatase inhibitor cocktail and incubated for 40 min on ice. The nuclear extract was obtained by centrifugation at 17,000×g for 5 min at 4°C. BCA assay (BCA Protein Assay Kit, Pierce) was performed to measure the protein mass in each fraction.



*Immunoblotting.* Immunoblotting was performed as described.<sup>3</sup> The protein samples were separated on 12% polyacrylamide gels (Criterion TGX precast gels, Bio-Rad) and transferred onto nitrocellulose membranes (0.2  $\mu$ m, Bio-Rad). The membranes were incubated with Odyssey blocking buffer (Li-Cor, Lincoln, NE) for 1 h and probed with primary antibody in Odyssey blocking buffer containing 0.5% Tween-20 overnight at 4°C. Primary antibodies were obtained commercially and used as followed: CREB antibody (2  $\mu$ g, 17-600, Millipore), C/EBP $\beta$  (2  $\mu$ g, sc-150, Santa Cruz), p-CREB antibody (S133, 17-10131, Millipore), ATF1 antibody (sc-243, Santa Cruz),  $\beta$ -catenin antibody (9562, Cell Signaling) and p- $\beta$ -catenin antibody (S552, 9566, Cell Signaling). After removal of the primary antibody solution, the membranes were washed and incubated for 1 h with anti-rabbit IgG antibody conjugated with appropriate fluorescent dyes (Lincoln, NE, 1:5,000). The fluorescent signal was detected using a Li-Cor Odyssey Imaging System (ODY-0428, Li-COR).

*Assay for Transposase-Accessible Chromatin using Sequencing (ATAC-Seq).* ATAC-Seq was performed following a method published by Buenrostro et al..<sup>4</sup> Briefly, a homogenous single cell suspension was prepared by harvesting cells using a cell scraper and a cell strainer in cold PBS buffer. 50,000 cells were centrifuged at 500xg for 5 min, 4°C and washed with 50  $\mu$ l of cold PBS buffer. The plasma membrane was lysed in 50  $\mu$ l of cold lysis buffer (10 mM Tris-HCl, pH 7.4, 10 mM NaCl, 3 mM MgCl<sub>2</sub>, 0.1% NP-40) and centrifuged immediately at 500xg for 10 min, 4°C to obtain nuclei. The nuclear pellets were reacted in the transposition reaction mixture of 1X Tagment DNA Buffer (FC-121-1030, Illumina) and Tn5 transposase (FC-121-1030, Illumina) for 30 min at 37°C. DNA was purified using a Qiagen MinElute PCR Purification Kit (QIAGEN). The transposed DNA fragments were amplified in the PCR mixture containing a specific index adapter (Illumina standard index adapter) for each sample by PCR (5 cycles as initial PCR and 9-11 cycles as final PCR). Amplified libraries were purified using a AMPure beads (1:1.8 ratio, BECKMAN COULTER). Libraries were quantified using a Qubit® dsDNA

High-Sensitivity Assay Kit (Q32854, Life Technologies). Fragment size distribution was tested on E-Gel (2%, Invitrogen). DNA libraries were sequenced on an Illumina HiSeq 3000 platform by the NHLBI DNA Sequencing and Genomics Core, NHLBI.

*Chromatin immunoprecipitation (ChIP) followed by DNA sequencing (ChIP-Seq).*

Chromatin immunoprecipitation (ChIP) of CREB and C/EBP $\beta$  was performed using truChIP™ Chromatin Shearing Reagent Kit (Covaris) and SimpleChIP® Enzymatic Chromatin IP Kit (Cell Signaling) as manufacturer's protocol. Buffers used in the ChIP procedure were provided in the kits. Cells were grown on permeable membrane supports (Transwell permeable support 100 mm dish, 3419, Costar) until fully polarized (7 days). The cells were incubated in serum- and hormone-free medium for 24 h before dDAVP treatment and exposed to 0.1 nM dDAVP or vehicle at basolateral side for 30 min or 24 hours. The cells on membrane supports were washed with PBS and exposed to "fixation buffer" (included in kit) for 5 min. A solution containing formaldehyde (final 1.1%) was added to the cells to crosslink DNA with DNA-bound proteins. The crosslink reaction was quenched by adding the "quenching buffer" for 5 min. The cells were collected in 5 mL PBS using a cell scraper and centrifuged at 200 $\times$ g for 5 min at 4°C. Cells were washed with PBS and lysed in lysis buffer containing the protease inhibitor cocktail described above. To increase the efficiency of lysis, the solution was resuspended gently using a pipette and the tubes were rotated gently for 10 min at 4°C. The pellets were collected by centrifugation at 1,700 $\times$ g for 5 min at 4°C, washed with wash buffer containing protease inhibitor cocktail, and washed two times with 1 mL of shearing buffer containing the protease inhibitor cocktail. The nuclear pellets were resuspended in shearing buffer. The samples were transferred to new glass tubes with AFA Fiber (TC 12 $\times$ 12 mm, Covaris) and sheared using a Covaris S2 system (Duty cycle: 5%, Intensity: 4, Cycles per Burst: 200, Temperature: 4°C). Protein mass in the sheared chromatin samples was determined by BCA assay. For DNA purification, the sheared chromatin sample (20  $\mu$ L) was treated with RNase (30 min, 37°C) and

proteinase K (16 h, 65°C) serially. The sheared DNAs were purified using a DNA Clean & Concentrator™-5 (D4014, Zymo Research) and DNA amounts were measured using a Qubit® dsDNA High-Sensitivity Assay Kit (Q32854, Life technologies).

For immunoprecipitation (IP) of CREB and C/EBPβ in the sheared chromatin samples, 800-900 µg of total sheared chromatin was used for each IP set. The sheared chromatin samples were incubated with 4 µg of CREB antibody (17-600, Millipore), C/EBPβ (sc-150, Santa Cruz) or normal IgG rabbit antibody (2729P, Cell Signaling, Inc.) at 4°C overnight with gentle rotation. Magnetic beads conjugated with Protein G (ChIP-Grade Protein G Magnetic Beads, Cell Signaling, Inc.) were added to the samples. After incubation for 2 h, the beads were collected using a magnetic rack and washed following the manufacturer's protocol (Cell Signaling, Inc.). The beads were incubated in ChIP elution buffer for 30 min at 65°C with vortexing (1,200 rpm). After ChIP, DNA was purified for deep sequencing. Briefly, proteins in ChIP samples were degraded by treatment with Proteinase K/5 M NaCl solution overnight at 56°C. DNA was purified and concentrated using a DNA Clean & Concentrator™-5 (D4014, Zymo Research) and DNA amounts were measured using a Qubit® dsDNA High-Sensitivity Assay Kit (Q32854, Life technologies).

For deep sequencing of transcription factor ChIP products, a library was prepared using Ovation® SP Ultralow Library System (NuGEN) as described in the manufacturer's protocol. The purified DNA from ChIP products were mixed with RNAClean XP beads (BECKMAN COULTER) to enrich DNA and incubated for 10 min at room temperature. The DNA-bead mixture was used to prepare libraries: 10 µL from each ChIP sample and 7 µL from each 2% input sample. The mixture of beads and DNA were loaded on a Mondrian SP Cartridge. The DNAs were repaired and ligated with specific adaptors (L2V9DR-1 to -8) in each sample automatically. The eluted DNA was collected from the cartridge and mixed with Library Enrichment Master Mix. The enrichment was carried out through PCR (DNAs were denatured at

94°C for 30 sec. Annealing of primers to the templates and extension were allowed at 60°C for 30 sec and 72°C for 1 min sequentially. DNA libraries were enriched by repeating PCR with 10-16 cycles. The enriched DNA libraries were purified and separated on E-Gel® EX 2% agarose gel (G402002, Invitrogen). The DNA libraries were purified from the gel piece between 250 bp and 500 bp using a Gel DNA Recovery kit (D4008, Zymo Research). Ten nanograms of DNA library from each sample were used for deep sequencing on an Illumina HiSeq 2000 platform by the NHLBI DNA Sequencing and Genomics Core, NHLBI.

*Data processing.* Sequencing data was qualified by FastQC (<http://www.bioinformatics.babraham.ac.uk/projects/fastqc>). The sequence reads were mapped on the mouse reference genome (mm10) using *Burrows-Wheeler Aligner (BWA)*<sup>5</sup> and *Samtools*.<sup>6</sup> All reads mapped to the reference genome (95~98% of mapping rate) were used for downstream peak calling, motif analysis, and bioinformatic analysis. Peaks were called from total mapped reads by *MACS2* (version 2.1, default with  $q < 0.01$ ). Reproducible peaks were identified by intersection between multiple replicates for quantification of read counts from each replicate using *Bedtools*.<sup>7</sup> Motif analysis of CREB and C/EBP $\beta$  binding sites identified by *MACS2* and *Bedtools* was carried out using *MEME-ChIP* (version 4.11).<sup>8</sup> R package *ChIPpeakAnno* (version 3.2.2)<sup>9</sup> was used in the analysis for genomic distribution of transcription factor binding sites and gene annotation near transcription factor binding sites. Plots were generated using R package *ggplot2*.<sup>10</sup>

For ATAC-Seq data processing, adapter sequences were trimmed for both forward and reverse reads using *cutadapt* (-q 30 --minimum-length 36 --paired-output) and aligned on mouse reference genome mm10 using *bowtie2* (-q -X 2000 --no-mixed --no-discordant). Duplicates were removed from mapped reads using *Picard*. Bam files were converted to Bed files using *Bedtools*. Reads were shifted 4 bp for the forward reads and 5 bp for the reverse reads. Peaks were identified using *MACS2* (-q 0.01 --nomodel --shift -37 --extsize 73 --keep-dup -SPMR).

BigWig files for UCSC browser tracks were generated using *UCSC bedClip* and *bedGraphToBigWig*.

*Data mining and bioinformatic analysis.* A dataset of CTCF ChIP-Seq was downloaded from mouse ENCODE database published by Yue et al. (GEO, GSE 36027).<sup>11</sup> Two ChIP-Seq datasets obtained in mpkCCD clone 11 cells were downloaded from GSE95009 for histone H3K27 acetylation ChIP-Seq<sup>12</sup> and GSE79584 for RNA polymerase II ChIP-Seq.<sup>13</sup> Data from ATAC-Seq, H3K27Ac ChIP-Seq, and RNA polymerase II ChIP-Seq were transformed to obtain minimum Bayes' factors (range 0-1) as described<sup>14</sup> based on signal-to-noise ratios as a function of genomic position. The noise level for a given insulated region was estimated as twice the median signal across the region. The data from ATAC-Seq, H3K27Ac ChIP-Seq, and RNA polymerase II ChIP-Seq were integrated by multiplying the complements of their minimum Bayes' factors.

ATAC-Seq and ChIP-Seq data have been deposited at Gene Expression Omnibus (GEO, GSE98076 and GSE108786).

## References

1. Yu, MJ, Miller, RL, Uawithya, P, Rinschen, MM, Khositseth, S, Braucht, DW, Chou, CL, Pisitkun, T, Nelson, RD, Knepper, MA: Systems-level analysis of cell-specific AQP2 gene expression in renal collecting duct. *Proc Natl Acad Sci U S A*, 106: 2441-2446, 2009.
2. Bolger, SJ, Hurtado, PA, Hoffert, JD, Saeed, F, Pisitkun, T, Knepper, MA: Quantitative phosphoproteomics in nuclei of vasopressin-sensitive renal collecting duct cells. *Am J Physiol Cell Physiol*, 303: C1006-1020, 2012.
3. Pisitkun, T, Jacob, V, Schleicher, SM, Chou, CL, Yu, MJ, Knepper, MA: Akt and ERK1/2 pathways are components of the vasopressin signaling network in rat native IMCD. *Am J Physiol Renal Physiol*, 295: F1030-1043, 2008.
4. Buenrostro, JD, Giresi, PG, Zaba, LC, Chang, HY, Greenleaf, WJ: Transposition of native chromatin for fast and sensitive epigenomic profiling of open chromatin, DNA-binding proteins and nucleosome position. *Nat Methods*, 10: 1213-1218, 2013.
5. Li, H, Durbin, R: Fast and accurate short read alignment with Burrows-Wheeler transform. *Bioinformatics*, 25: 1754-1760, 2009.
6. Li, H, Handsaker, B, Wysoker, A, Fennell, T, Ruan, J, Homer, N, Marth, G, Abecasis, G, Durbin, R, Genome Project Data Processing, S: The Sequence Alignment/Map format and SAMtools. *Bioinformatics*, 25: 2078-2079, 2009.
7. Quinlan, AR, Hall, IM: BEDTools: a flexible suite of utilities for comparing genomic features. *Bioinformatics*, 26: 841-842, 2010.
8. Machanick, P, Bailey, TL: MEME-ChIP: motif analysis of large DNA datasets. *Bioinformatics*, 27: 1696-1697, 2011.
9. Zhu, LJ, Gazin, C, Lawson, ND, Pages, H, Lin, SM, Lapointe, DS, Green, MR: ChIPpeakAnno: a Bioconductor package to annotate ChIP-seq and ChIP-chip data. *BMC Bioinformatics*, 11: 237, 2010.

10. Wickham, H: *Ggplot2 : elegant graphics for data analysis*, New York, Springer, 2009.
11. Yue, F, Cheng, Y, Breschi, A, Vierstra, J, Wu, W, Ryba, T, Sandstrom, R, Ma, Z, Davis, C, Pope, BD, Shen, Y, Pervouchine, DD, Djebali, S, Thurman, RE, Kaul, R, Rynes, E, Kirilusha, A, Marinov, GK, Williams, BA, Trout, D, Amrhein, H, Fisher-Aylor, K, Antoshechkin, I, DeSalvo, G, See, LH, Fastuca, M, Drenkow, J, Zaleski, C, Dobin, A, Prieto, P, Lagarde, J, Bussotti, G, Tanzer, A, Denas, O, Li, K, Bender, MA, Zhang, M, Byron, R, Groudine, MT, McCleary, D, Pham, L, Ye, Z, Kuan, S, Edsall, L, Wu, YC, Rasmussen, MD, Bansal, MS, Kellis, M, Keller, CA, Morrissey, CS, Mishra, T, Jain, D, Dogan, N, Harris, RS, Cayting, P, Kawli, T, Boyle, AP, Euskirchen, G, Kundaje, A, Lin, S, Lin, Y, Jansen, C, Malladi, VS, Cline, MS, Erickson, DT, Kirkup, VM, Learned, K, Sloan, CA, Rosenbloom, KR, Lacerda de Sousa, B, Beal, K, Pignatelli, M, Flicek, P, Lian, J, Kahveci, T, Lee, D, Kent, WJ, Ramalho Santos, M, Herrero, J, Notredame, C, Johnson, A, Vong, S, Lee, K, Bates, D, Neri, F, Diegel, M, Canfield, T, Sabo, PJ, Wilken, MS, Reh, TA, Giste, E, Shafer, A, Kutayavin, T, Haugen, E, Dunn, D, Reynolds, AP, Neph, S, Humbert, R, Hansen, RS, De Bruijn, M, Selleri, L, Rudensky, A, Josefowicz, S, Samstein, R, Eichler, EE, Orkin, SH, Levasseur, D, Papayannopoulou, T, Chang, KH, Skoultchi, A, Gosh, S, Disteche, C, Treuting, P, Wang, Y, Weiss, MJ, Blobel, GA, Cao, X, Zhong, S, Wang, T, Good, PJ, Lowdon, RF, Adams, LB, Zhou, XQ, Pazin, MJ, Feingold, EA, Wold, B, Taylor, J, Mortazavi, A, Weissman, SM, Stamatoyannopoulos, JA, Snyder, MP, Guigo, R, Gingeras, TR, Gilbert, DM, Hardison, RC, Beer, MA, Ren, B, Mouse, EC: A comparative encyclopedia of DNA elements in the mouse genome. *Nature*, 515: 355-364, 2014.
12. Isobe, K, Jung, HJ, Yang, CR, Claxton, J, Sandoval, P, Burg, MB, Raghuram, V, Knepper, MA: Systems-level identification of PKA-dependent signaling in epithelial cells. *Proc Natl Acad Sci U S A*, 114: E8875-E8884, 2017.

13. Sandoval, PC, Claxton, JS, Lee, JW, Saeed, F, Hoffert, JD, Knepper, MA: Systems-level analysis reveals selective regulation of Aqp2 gene expression by vasopressin. *Sci Rep*, 6: 34863, 2016.
14. Xue, Z, Chen, JX, Zhao, Y, Medvar, B, Knepper, MA: Data integration in physiology using Bayes' rule and minimum Bayes' factors: deubiquitylating enzymes in the renal collecting duct. *Physiol Genomics*, 49: 151-159, 2017.



Suuplemental Dataset 1. Transcription factors expressed in mpkCCD

Isobe K, Jung HJ, Yang CR, Claxton J, Sandoval P, Burg MB, Raghuram V, Knepper MA. Systems-level identification of PKA-dependent signaling in epithelial cells. Proc Natl Acad Sci U S A. 2017 Oct 17;114(42):E8875-E8884. doi: 10.1073/pnas.1709123114. Epub 2017 Oct 2. PubMed PMID: 28973931

| Gene Symbol | Description                                                           | TPM mean | TPM SD | TF Family     |
|-------------|-----------------------------------------------------------------------|----------|--------|---------------|
| Atf4        | cyclic AMP-dependent transcription factor ATF-4                       | 578.8    | 63.7   | TF_bZIP       |
| Tsc22d1     | TSC22 domain family protein 1 isoform X5                              | 410.9    | 55.2   | TSC22         |
| Ybx1        | nuclease-sensitive element-binding protein 1                          | 321.4    | 9.8    | CSD           |
| Tsc22d3     | TSC22 domain family protein 3 isoform X1                              | 284.8    | 18.2   | TSC22         |
| Csde1       | cold shock domain-containing protein E1 isoform X3                    | 283.3    | 20.3   | CSD           |
| Jund        | transcription factor jun-D isoform deltaJunD                          | 269.1    | 61.7   | TF_bZIP       |
| Ssrp1       | FACT complex subunit SSRP1                                            | 248.2    | 26.2   | HMG           |
| Junb        | transcription factor jun-B                                            | 245.0    | 29.1   | TF_bZIP       |
| Ybx3        | Y-box-binding protein 3 long isoform                                  | 223.5    | 10.8   | CSD           |
| Cers2       | ceramide synthase 2 isoform X1                                        | 192.4    | 8.2    | Homeobox      |
| Zfp91       | E3 ubiquitin-protein ligase ZFP91                                     | 185.8    | 12.6   | zf-C2H2       |
| Esrrb       | steroid hormone receptor ERR2 isoform 2                               | 179.4    | 7.3    | ESR-like      |
| Litaf       | lipopolysaccharide-induced tumor necrosis factor-alpha factor homolog | 175.1    | 12.9   | zf-LITAF-like |
| Ehf         | ETS homologous factor isoform X3                                      | 168.8    | 19.7   | ETS           |
| Carhsp1     | calcium-regulated heat stable protein 1                               | 153.7    | 24.1   | CSD           |
| Trp53       | cellular tumor antigen p53 isoform X1                                 | 148.2    | 8.5    | P53           |
| Nfe2l2      | nuclear factor erythroid 2-related factor 2                           | 147.0    | 11     | TF_bZIP       |
| Pax8        | paired box protein Pax-8                                              | 141.5    | 9.6    | PAX           |
| Tfdp1       | transcription factor Dp-1 isoform a                                   | 137.0    | 41.6   | E2F           |

|        |                                                                                      |       |      |          |
|--------|--------------------------------------------------------------------------------------|-------|------|----------|
| Elf3   | ETS-related transcription factor Elf-3                                               | 136.7 | 7.6  | ETS      |
| Nr2f6  | nuclear receptor subfamily 2 group F member 6                                        | 130.5 | 28.6 | RXR-like |
| Klf6   | Krueppel-like factor 6                                                               | 129.8 | 8.9  | zf-C2H2  |
| Mta2   | metastasis-associated protein MTA2                                                   | 127.9 | 10.3 | zf-GATA  |
| Tcf3   | transcription factor E2-alpha isoform 8                                              | 111.4 | 7.9  | bHLH     |
| Jdp2   | jun dimerization protein 2 isoform X2                                                | 107.0 | 18.5 | TF_bZIP  |
| Hmg20b | SWI/SNF-related matrix-associated actin-dependent regulator of zinc finger protein 7 | 106.3 | 7    | HMG      |
| Zfp7   | zinc finger protein 7                                                                | 105.7 | 10.8 | zf-C2H2  |
| Ubtf   | nucleolar transcription factor 1 isoform X4                                          | 104.1 | 4.2  | HMG      |
| Hbp1   | HMG box-containing protein 1 isoform X3                                              | 102.8 | 12.2 | HMG      |
| Glis2  | zinc finger protein GLIS2 isoform X4                                                 | 100.3 | 15.8 | zf-C2H2  |
| Hmgb1  | high mobility group protein B1                                                       | 99.1  | 2.7  | HMG      |
| Zzz3   | ZZ-type zinc finger-containing protein 3 isoform X1                                  | 98.6  | 6.4  | MYB      |
| Cbfb   | core-binding factor subunit beta isoform 4                                           | 98.2  | 24.3 | CBF      |
| Hoxd8  | homeobox protein Hox-D8 isoform c                                                    | 98.0  | 11   | Homeobox |
| Mecom  | MDS1 and EVI1 complex locus protein EVI1 isoform X11                                 | 97.8  | 21.3 | zf-C2H2  |
| Sp3    | transcription factor Sp3 isoform 1                                                   | 97.8  | 7.3  | zf-C2H2  |
| Gtf2i  | general transcription factor II-I isoform 5                                          | 97.1  | 30.4 | GTF2I    |
| Srebf1 | sterol regulatory element-binding protein 1 isoform 2                                | 97.1  | 11.5 | bHLH     |
| Hmgb2  | high mobility group protein B2 isoform X1                                            | 96.7  | 13.9 | HMG      |
| Scx    | basic helix-loop-helix transcription factor scleraxis                                | 96.6  | 30.3 | bHLH     |
| Zhx3   | zinc fingers and homeoboxes protein 3                                                | 93.2  | 11   | Homeobox |
| Hoxb9  | homeobox protein Hox-B9                                                              | 93.1  | 13.2 | Homeobox |
| Irf6   | interferon regulatory factor 6 isoform X1                                            | 92.7  | 12.7 | IRF      |

|         |                                                             |      |      |           |
|---------|-------------------------------------------------------------|------|------|-----------|
| Cux1    | protein CASP isoform X1                                     | 91.1 | 23.7 | CUT       |
| Tfcp2l1 | transcription factor CP2-like protein 1 isoform X1          | 90.8 | 17.1 | CP2       |
| Gtf3a   | transcription factor IIIA                                   | 90.2 | 15.4 | zf-C2H2   |
| Nfe2l1  | nuclear factor erythroid 2-related factor 1 isoform 4       | 88.6 | 20.4 | TF_bZIP   |
| Rarg    | retinoic acid receptor gamma isoform X1                     | 88.2 | 7.6  | THR-like  |
| Elf2    | ETS-related transcription factor Elf-2                      | 87.5 | 3.1  | ETS       |
| Zfp740  | zinc finger protein 740 isoform X5                          | 85.6 | 3.1  | zf-C2H2   |
| Maz     | myc-associated zinc finger protein                          | 84.9 | 11.1 | zf-C2H2   |
| Id2     | DNA-binding protein inhibitor ID-2                          | 84.4 | 2.3  | bHLH      |
| Xbp1    | X-box-binding protein 1 isoform XBP1(S)                     | 83.4 | 3.8  | TF_bZIP   |
| Ets2    | protein C-ets-2                                             | 82.2 | 15.4 | ETS       |
| Rela    | transcription factor p65 isoform X2                         | 81.3 | 13.4 | RHD       |
| Foxq1   | forkhead box protein Q1                                     | 80.4 | 8.1  | Fork head |
| Elf1    | ETS-related transcription factor Elf-1                      | 80.1 | 17.1 | ETS       |
| Yy1     | transcriptional repressor protein YY1 isoform X1            | 78.6 | 0.1  | zf-C2H2   |
| Hoxb7   | homeobox protein Hox-B7                                     | 78.4 | 11   | Homeobox  |
| Gatad1  | GATA zinc finger domain-containing protein 1                | 77.5 | 14.5 | zf-GATA   |
| Hes1    | transcription factor HES-1 isoform X1                       | 77.3 | 5.3  | bHLH      |
| Tead2   | transcriptional enhancer factor TEF-4 isoform a             | 76.3 | 15.9 | TEA       |
| Tgif1   | homeobox protein TGIF1 isoform X1                           | 75.9 | 8.1  | Homeobox  |
| Ddit3   | DNA damage-inducible transcript 3 protein                   | 71.3 | 18.5 | TF_bZIP   |
| Sub1    | activated RNA polymerase II transcriptional coactivator p15 | 69.2 | 6.2  | PC4       |
| E2f4    | transcription factor E2F4                                   | 68.3 | 11.8 | E2F       |
| Nfat5   | nuclear factor of activated T-cells 5 isoform c             | 65.3 | 28.4 | RHD       |

|         |                                                                |      |      |               |
|---------|----------------------------------------------------------------|------|------|---------------|
| Ctcf    | transcriptional repressor CTCF isoform X6                      | 65.2 | 12   | zf-C2H2       |
| Aff4    | AF4/FMR2 family member 4                                       | 65.1 | 10.3 | AF-4          |
| Stat6   | signal transducer and transcription activator 6                | 64.3 | 9.5  | STAT          |
| Klf5    | Krueppel-like factor 5                                         | 64.2 | 8.4  | zf-C2H2       |
| Nr1h2   | oxysterols receptor LXR-beta isoform a                         | 63.9 | 2.5  | THR-like      |
| Hoxd4   | homeobox protein Hox-D4                                        | 63.8 | 4.2  | Homeobox      |
| Gata3   | trans-acting T-cell-specific transcription factor GATA-3       | 63.2 | 14.8 | zf-GATA       |
| Myc     | myc proto-oncogene protein isoform b                           | 61.7 | 8.7  | bHLH          |
| Zfp410  | zinc finger protein 410 isoform 1                              | 61.7 | 5.5  | zf-C2H2       |
| Mxd3    | max dimerization protein 3                                     | 60.8 | 10.5 | bHLH          |
| Cdc5l   | cell division cycle 5-like protein isoform X1                  | 60.5 | 3.3  | MYB           |
| Grhl2   | grainyhead-like protein 2 homolog isoform X4                   | 60.5 | 3.8  | CP2           |
| Mxd4    | max dimerization protein 4                                     | 60.4 | 12.9 | bHLH          |
| Nfkb2   | nuclear factor NF-kappa-B p100 subunit isoform b               | 59.8 | 7.1  | RHD           |
| Whsc1   | histone-lysine N-methyltransferase NSD2 isoform X1             | 58.4 | 11.6 | HMG           |
| Sp1     | transcription factor Sp1 isoform X1                            | 57.7 | 6.8  | zf-C2H2       |
| Zkscan1 | zinc finger protein with KRAB and SCAN domains 1 isoform X2    | 57.3 | 8.8  | zf-C2H2       |
| Nfkb1   | nuclear factor NF-kappa-B p105 subunit                         | 56.4 | 10.8 | RHD           |
| Irf3    | interferon regulatory factor 3 isoform X1                      | 56.3 | 1.6  | IRF           |
| Mta3    | metastasis-associated protein MTA3 isoform X5                  | 55.9 | 6.4  | zf-GATA       |
| Zfp664  | zinc finger protein 664                                        | 55.9 | 13.9 | zf-C2H2       |
| Patz1   | POZ-, AT hook-, and zinc finger-containing protein 1 isoform 2 | 55.7 | 5.9  | ZBTB          |
| Zfp219  | zinc finger protein 219 isoform X1                             | 55.4 | 16.8 | zf-C2H2       |
| Cdip1   | cell death-inducing p53-target protein 1 isoform X1            | 55.0 | 2.9  | zf-LITAF-like |

|        |                                                             |      |     |           |
|--------|-------------------------------------------------------------|------|-----|-----------|
| Hsf1   | heat shock factor protein 1 isoform 5                       | 54.7 | 2.8 | HSF       |
| Kat7   | histone acetyltransferase KAT7 isoform X4                   | 54.3 | 6.3 | zf-C2HC   |
| Max    | protein max isoform X3                                      | 54.1 | 7   | bHLH      |
| Zfp266 | zinc finger protein 426-like isoform X1                     | 54.0 | 8.8 | zf-C2H2   |
| Ncor1  | nuclear receptor corepressor 1 isoform 2                    | 53.8 | 4.9 | MYB       |
| Thap7  | THAP domain-containing protein 7 isoform X4                 | 53.8 | 0.6 | THAP      |
| Rxrb   | retinoic acid receptor RXR-beta isoform 4                   | 53.7 | 3.9 | RXR-like  |
| Mta1   | metastasis-associated protein MTA1 isoform X2               | 53.6 | 4.7 | zf-GATA   |
| Setdb1 | histone-lysine N-methyltransferase SETDB1 isoform b         | 53.3 | 3.1 | MBD       |
| Aebp2  | zinc finger protein AEBP2 isoform 3                         | 52.8 | 7.4 | zf-C2H2   |
| Mbd3   | methyl-CpG-binding domain protein 3 isoform 2               | 52.8 | 3   | MBD       |
| Rxra   | retinoic acid receptor RXR-alpha isoform X1                 | 52.2 | 8   | RXR-like  |
| Smad4  | mothers against decapentaplegic homolog 4 isoform X1        | 52.0 | 2.1 | MH1       |
| Zbtb7b | zinc finger and BTB domain-containing protein 7B isoform X1 | 51.2 | 3.3 | ZBTB      |
| Hoxd9  | homeobox protein Hox-D9                                     | 50.3 | 9.8 | Homeobox  |
| Ets1   | protein C-ets-1 isoform X1                                  | 50.1 | 6.2 | ETS       |
| Foxo3  | forkhead box protein O3 isoform X1                          | 49.6 | 3.9 | Fork head |
| Mbd2   | methyl-CpG-binding domain protein 2 isoform 2               | 49.2 | 1.5 | MBD       |
| Rcor1  | REST corepressor 1 isoform X1                               | 48.5 | 4.5 | MYB       |
| Hes6   | transcription cofactor HES-6 isoform X1                     | 48.4 | 8.3 | bHLH      |
| Thap11 | THAP domain-containing protein 11                           | 48.4 | 5.1 | THAP      |
| Dnajc2 | dnaJ homolog subfamily C member 2                           | 48.3 | 2.6 | MYB       |
| Gabpa  | GA-binding protein alpha chain                              | 47.1 | 0.4 | ETS       |
| VeZF1  | vascular endothelial zinc finger 1 isoform X2               | 46.8 | 2.5 | zf-C2H2   |

|             |                                                              |      |      |           |
|-------------|--------------------------------------------------------------|------|------|-----------|
| Srebf2      | sterol regulatory element-binding protein 2 isoform X1       | 46.7 | 8.3  | bHLH      |
| Jun         | transcription factor AP-1                                    | 46.3 | 6    | TF_bZIP   |
| Nrf1        | nuclear respiratory factor 1 isoform b                       | 45.7 | 2.1  | Nrf1      |
| Wdhd1       | WD repeat and HMG-box DNA-binding protein 1                  | 45.6 | 9.4  | HMG       |
| Zfp386      | zinc finger protein 386 (Krueppel-like) isoform X2           | 45.4 | 1.8  | zf-C2H2   |
| Zscan21     | zinc finger and SCAN domain-containing protein 21 isoform X1 | 45.4 | 9.1  | zf-C2H2   |
| Zfp62       | zinc finger protein 62 isoform X3                            | 45.0 | 0.8  | zf-C2H2   |
| Tox4        | TOX high mobility group box family member 4                  | 44.6 | 4.9  | HMG       |
| Atf5        | cyclic AMP-dependent transcription factor ATF-5              | 44.3 | 6.2  | TF_bZIP   |
| Usf1        | upstream stimulatory factor 1 isoform 2                      | 43.4 | 1.9  | bHLH      |
| Esrra       | steroid hormone receptor ERR1                                | 43.2 | 2.7  | ESR-like  |
| Zfp687      | zinc finger protein 687 isoform X1                           | 43.0 | 4.2  | zf-C2H2   |
| Zbtb18      | zinc finger and BTB domain-containing protein 18 isoform 1   | 42.9 | 1.4  | ZBTB      |
| Pbrm1       | protein polybromo-1 isoform X32                              | 42.7 | 15.2 | HMG       |
| Smad5       | mothers against decapentaplegic homolog 5 isoform X2         | 42.3 | 4.3  | MH1       |
| Zscan26     | zinc finger and SCAN domain-containing protein 26 isoform X1 | 42.0 | 3    | zf-C2H2   |
| Klf10       | Krueppel-like factor 10 isoform X1                           | 41.4 | 2.2  | zf-C2H2   |
| Nfatc3      | nuclear factor of activated T-cells, cytoplasmic 3           | 41.4 | 11.2 | RHD       |
| Zfp948      | zinc finger protein 948 isoform X1                           | 41.4 | 4.3  | zf-C2H2   |
| Cebpb       | CCAAT/enhancer-binding protein beta isoform c                | 41.2 | 2    | C/EBP     |
| Crebzf      | CREB/ATF bZIP transcription factor isoform X1                | 41.0 | 3.5  | TF_bZIP   |
| 700081O15Ri | uncharacterized protein C11orf95 homolog isoform X2          | 40.9 | 6.4  | zf-BED    |
| Hmga1       | high mobility group protein HMG-I/HMG-Y isoform e            | 40.8 | 3.2  | HMG1/HMGY |
| Nfx1        | transcriptional repressor NF-X1 isoform X2                   | 40.8 | 2.2  | zf-NF-X1  |

|         |                                                                |      |      |           |
|---------|----------------------------------------------------------------|------|------|-----------|
| Thap4   | THAP domain-containing protein 4 isoform 2                     | 40.8 | 3.6  | THAP      |
| Hoxb6   | homeobox protein Hox-B6 isoform X1                             | 40.7 | 3.7  | Homeobox  |
| Tead3   | transcriptional enhancer factor TEF-5 isoform 2                | 40.4 | 5.5  | TEA       |
| Irf1    | interferon regulatory factor 1 isoform a                       | 40.2 | 6.8  | IRF       |
| Zfp146  | zinc finger protein OZF isoform X1                             | 40.1 | 4    | zf-C2H2   |
| Aff1    | AF4/FMR2 family member 1 isoform 1                             | 39.9 | 10.4 | AF-4      |
| Smarcc2 | SWI/SNF complex subunit SMARCC2 isoform X5                     | 39.2 | 5.7  | MYB       |
| Smarce1 | SWI/SNF-related matrix-associated actin-dependent regulator of | 38.9 | 8.2  | HMG       |
| Prdm4   | PR domain zinc finger protein 4 isoform X3                     | 38.7 | 0.8  | zf-C2H2   |
| Mynn    | myoneurin isoform 2                                            | 38.6 | 3    | ZBTB      |
| Zfp652  | zinc finger protein 652                                        | 38.5 | 7.3  | zf-C2H2   |
| Atf2    | cyclic AMP-dependent transcription factor ATF-2 isoform 3      | 38.3 | 4.9  | TF_bZIP   |
| Arid2   | AT-rich interactive domain-containing protein 2                | 38.2 | 3.8  | ARID      |
| Mbd1    | methyl-CpG-binding domain protein 1                            | 38.2 | 3.6  | MBD       |
| Tfam    | transcription factor A, mitochondrial isoform X1               | 38.2 | 5.9  | HMG       |
| Zkscan3 | zinc finger protein with KRAB and SCAN domains 3 isoform X3    | 38.0 | 2    | zf-C2H2   |
| Foxj1   | forkhead box protein J1 isoform X1                             | 37.7 | 13.9 | Fork head |
| Bbx     | HMG box transcription factor BBX isoform X3                    | 37.6 | 1.3  | HMG       |
| Foxk2   | forkhead box protein K2                                        | 37.6 | 3.9  | Fork head |
| Elk3    | ETS domain-containing protein Elk-3 isoform Elk3c              | 37.2 | 5.6  | ETS       |
| Rest    | RE1-silencing transcription factor isoform X1                  | 37.1 | 5.2  | zf-C2H2   |
| Zfp335  | zinc finger protein 335 isoform X2                             | 37.1 | 3.8  | zf-C2H2   |
| Tcf12   | transcription factor 12 isoform X8                             | 36.9 | 4.3  | bHLH      |
| Dmtf1   | cyclin-D-binding Myb-like transcription factor 1 isoform X2    | 36.8 | 4.9  | MYB       |

|         |                                                                    |      |      |           |
|---------|--------------------------------------------------------------------|------|------|-----------|
| Mlx     | max-like protein X isoform beta                                    | 36.7 | 8.1  | bHLH      |
| Nfib    | nuclear factor 1 B-type isoform X3                                 | 36.4 | 13.4 | CTF/NFI   |
| Adnp    | activity-dependent neuroprotector homeobox protein isoform 1       | 36.1 | 13.5 | Homeobox  |
| Creb1   | cyclic AMP-responsive element-binding protein 1 isoform C          | 35.8 | 1.9  | TF_bZIP   |
| Zfp263  | zinc finger protein 263 isoform X1                                 | 35.7 | 1.3  | zf-C2H2   |
| Rorc    | nuclear receptor ROR-gamma isoform X1                              | 35.6 | 7.1  | THR-like  |
| Creb3   | cyclic AMP-responsive element-binding protein 3                    | 35.3 | 1.3  | TF_bZIP   |
| Zfp64   | zinc finger protein 64                                             | 35.3 | 1.9  | zf-C2H2   |
| Zfp367  | zinc finger protein 367 isoform X1                                 | 35.2 | 1.4  | zf-C2H2   |
| Kdm5c   | lysine-specific demethylase 5C isoform X7                          | 35.1 | 2.9  | ARID      |
| Foxn3   | forkhead box protein N3 isoform X2                                 | 34.7 | 3    | Fork head |
| Prkrir  | 52 kDa repressor of the inhibitor of the protein kinase isoform X1 | 34.7 | 4.3  | THAP      |
| Hmgxb4  | HMG domain-containing protein 4 isoform X1                         | 34.6 | 7.5  | HMG       |
| Smarcc1 | SWI/SNF complex subunit SMARCC1                                    | 34.6 | 5.7  | MYB       |
| Zfp148  | zinc finger protein 148 isoform X2                                 | 34.6 | 3.6  | zf-C2H2   |
| Hmgb3   | high mobility group protein B3                                     | 33.9 | 1.7  | HMG       |
| Irf9    | interferon regulatory factor 9 isoform 2                           | 33.9 | 3.5  | IRF       |
| Atf6    | cyclic AMP-dependent transcription factor ATF-6 alpha isoform X1   | 33.6 | 1.6  | TF_bZIP   |
| Zhx1    | zinc fingers and homeoboxes protein 1                              | 33.6 | 6    | Homeobox  |
| Zfp260  | zinc finger protein 260 isoform X1                                 | 33.3 | 2.3  | zf-C2H2   |
| Pbx3    | pre-B-cell leukemia transcription factor 3 isoform X2              | 33.2 | 8.2  | Homeobox  |
| Klf3    | Krueppel-like factor 3 isoform X1                                  | 33.1 | 8.4  | zf-C2H2   |
| Smad3   | mothers against decapentaplegic homolog 3 isoform X1               | 32.8 | 4.9  | MH1       |
| Zfp358  | zinc finger protein 358 isoform X1                                 | 32.7 | 4.5  | zf-C2H2   |



|          |                                                                                |      |     |          |
|----------|--------------------------------------------------------------------------------|------|-----|----------|
| Zfp512   | zinc finger protein 512 isoform X2                                             | 32.5 | 4.9 | zf-C2H2  |
| Thra     | thyroid hormone receptor alpha isoform 1                                       | 32.3 | 5.4 | THR-like |
| Tef      | thyrotroph embryonic factor isoform X3                                         | 32.2 | 8.3 | TF_bZIP  |
| Cebpg    | CCAAT/enhancer-binding protein gamma                                           | 32.1 | 3.5 | C/EBP    |
| Gtf2ird1 | general transcription factor II-I repeat domain-containing protein 1 isoform j | 32.1 | 8.9 | GTF2I    |
| E2f5     | transcription factor E2F5 isoform X1                                           | 31.9 | 0.6 | E2F      |
| Zbtb42   | zinc finger and BTB domain-containing protein 42 isoform X1                    | 31.9 | 4.9 | ZBTB     |
| Ahr      | aryl hydrocarbon receptor isoform 1                                            | 31.8 | 1.7 | bHLH     |
| Atf3     | cyclic AMP-dependent transcription factor ATF-3                                | 31.7 | 3.5 | TF_bZIP  |
| Nfyc     | nuclear transcription factor Y subunit gamma isoform X2                        | 31.4 | 2.6 | NF-YC    |
| Mef2a    | myocyte-specific enhancer factor 2A isoform X2                                 | 31.3 | 5.2 | SRF      |
| Zfp655   | zinc finger protein 655 isoform b                                              | 31.3 | 3.7 | zf-C2H2  |
| Zfp637   | zinc finger protein 32 isoform X3                                              | 31.1 | 3   | zf-C2H2  |
| Zkscan17 | zinc finger protein 496 isoform X3                                             | 30.9 | 0.7 | zf-C2H2  |
| Nr2c2    | nuclear receptor subfamily 2 group C member 2                                  | 30.8 | 4.3 | RXR-like |
| Zfp426   | zinc finger protein 426 isoform X6                                             | 30.8 | 3.1 | zf-C2H2  |
| Zbtb7a   | zinc finger and BTB domain-containing protein 7A                               | 30.6 | 2.8 | ZBTB     |
| Zxdc     | zinc finger protein ZXDC isoform 2                                             | 30.4 | 1.1 | zf-C2H2  |
| Klf11    | Krüppel-like factor 11                                                         | 30.3 | 1.9 | zf-C2H2  |
| Erf      | ETS domain-containing transcription factor ERF                                 | 29.9 | 3.3 | ETS      |
| Zfp276   | zinc finger protein 276 isoform X2                                             | 29.8 | 3.3 | zf-C2H2  |
| Elk4     | ETS domain-containing protein Elk-4 isoform X3                                 | 29.2 | 3.8 | ETS      |
| Fiz1     | flt3-interacting zinc finger protein 1                                         | 29.2 | 1.2 | zf-C2H2  |
| Zfp623   | zinc finger protein 623                                                        | 29.2 | 3.1 | zf-C2H2  |

|         |                                                                   |      |      |          |
|---------|-------------------------------------------------------------------|------|------|----------|
| Hnf1b   | hepatocyte nuclear factor 1-beta isoform 2                        | 29.0 | 4.6  | Homeobox |
| Arid4a  | AT-rich interactive domain-containing protein 4A                  | 28.8 | 2.6  | ARID     |
| Nfyb    | nuclear transcription factor Y subunit beta                       | 28.7 | 2.3  | NF-YB    |
| Nr3c1   | glucocorticoid receptor                                           | 28.5 | 4.8  | ESR-like |
| Baz2b   | bromodomain adjacent to zinc finger domain protein 2B isoform X18 | 28.4 | 4.2  | MBD      |
| Zfp523  | zinc finger protein 76 isoform X1                                 | 28.3 | 2.9  | zf-C2H2  |
| Arid4b  | AT-rich interactive domain-containing protein 4B isoform X1       | 28.0 | 5.4  | ARID     |
| Hoxb2   | homeobox protein Hox-B2 isoform X1                                | 27.9 | 2.3  | Homeobox |
| Maff    | transcription factor MafF isoform X1                              | 27.9 | 4.3  | TF_bZIP  |
| Stat3   | signal transducer and activator of transcription 3 isoform 2      | 27.8 | 2.1  | STAT     |
| Baz2a   | bromodomain adjacent to zinc finger domain protein 2A isoform X1  | 27.7 | 3    | MBD      |
| Zbtb20  | zinc finger and BTB domain-containing protein 20 isoform X3       | 27.7 | 4.8  | ZBTB     |
| Zfp384  | zinc finger protein 384 isoform X6                                | 27.7 | 3.5  | zf-C2H2  |
| Klf16   | Krueppel-like factor 16                                           | 27.5 | 2.8  | zf-C2H2  |
| Mafk    | transcription factor MafK isoform X1                              | 27.5 | 4.1  | TF_bZIP  |
| Nfya    | nuclear transcription factor Y subunit alpha isoform a            | 27.4 | 6.5  | NF-YA    |
| Zfp692  | zinc finger protein 692 isoform X1                                | 27.3 | 0.7  | zf-C2H2  |
| Bcl6    | B-cell lymphoma 6 protein homolog                                 | 27.1 | 4.1  | ZBTB     |
| Hinfp   | histone H4 transcription factor isoform X2                        | 27.0 | 1.9  | zf-C2H2  |
| Pias1   | E3 SUMO-protein ligase PIAS1                                      | 27.0 | 1.8  | zf-MIZ   |
| Nfxl1   | NF-X1-type zinc finger protein NFXL1 isoform X1                   | 26.9 | 3.8  | zf-NF-X1 |
| Nr2c1   | nuclear receptor subfamily 2 group C member 1                     | 26.9 | 2.3  | RXR-like |
| Bhlhe40 | class E basic helix-loop-helix protein 40                         | 26.7 | 11.8 | bHLH     |
| Pbx2    | pre-B-cell leukemia transcription factor 2                        | 26.5 | 1.6  | Homeobox |

|           |                                                             |      |     |           |
|-----------|-------------------------------------------------------------|------|-----|-----------|
| Pias2     | E3 SUMO-protein ligase PIAS2 isoform 3                      | 26.4 | 3.3 | zf-MIZ    |
| Pbx1      | pre-B-cell leukemia transcription factor 1 isoform a        | 26.2 | 6.9 | Homeobox  |
| Rara      | retinoic acid receptor alpha isoform 1                      | 26.2 | 3.6 | THR-like  |
| Hmbox1    | homeobox-containing protein 1 isoform X8                    | 26.0 | 8.3 | Homeobox  |
| Zfp809    | zinc finger protein 809 isoform X3                          | 26.0 | 1.5 | zf-C2H2   |
| Zfp251    | zinc finger protein 251                                     | 25.9 | 2.4 | zf-C2H2   |
| Hmga2     | high mobility group protein HMGI-C isoform X1               | 25.7 | 2   | HMGI/HMGY |
| Six4      | homeobox protein SIX4 isoform X1                            | 25.6 | 2.4 | Homeobox  |
| Kdm5b     | lysine-specific demethylase 5B isoform X2                   | 25.4 | 4.5 | ARID      |
| Zfp131    | zinc finger protein 131 isoform X2                          | 25.2 | 1.5 | ZBTB      |
| Pias3     | E3 SUMO-protein ligase PIAS3 isoform X1                     | 24.8 | 6.4 | zf-MIZ    |
| Klf9      | Krueppel-like factor 9                                      | 24.2 | 2.3 | zf-C2H2   |
| Zfp646    | zinc finger protein 646 isoform X1                          | 24.2 | 0.6 | zf-C2H2   |
| Hmga1-rs1 | high mobility group protein HMG-I/HMG-Y isoform 2           | 24.1 | 1.1 | HMGI/HMGY |
| Zbtb41    | zinc finger and BTB domain-containing protein 41 isoform X1 | 24.1 | 1.1 | ZBTB      |
| Zfp397    | zinc finger protein 397 isoform X1                          | 24.1 | 2.7 | zf-C2H2   |
| Arnt      | aryl hydrocarbon receptor nuclear translocator isoform X3   | 23.9 | 4   | bHLH      |
| Atf6b     | cyclic AMP-dependent transcription factor ATF-6 beta        | 23.9 | 1.3 | TF_bZIP   |
| Zfp513    | zinc finger protein 513 isoform X1                          | 23.8 | 2.5 | zf-C2H2   |
| Zfx       | zinc finger X-chromosomal protein isoform X4                | 23.7 | 1.8 | zf-C2H2   |
| Zbtb11    | zinc finger and BTB domain-containing protein 11            | 23.6 | 0.6 | ZBTB      |
| Zfp292    | zinc finger protein 292                                     | 23.6 | 2.1 | zf-C2H2   |
| Clock     | circadian locomoter output cycles protein kaput isoform 1   | 23.5 | 1.6 | bHLH      |
| Zfp553    | zinc finger protein 48 isoform X2                           | 23.5 | 0.8 | zf-C2H2   |

|         |                                                              |      |     |           |
|---------|--------------------------------------------------------------|------|-----|-----------|
| Srf     | serum response factor isoform X2                             | 23.3 | 0.6 | SRF       |
| Zbtb17  | zinc finger and BTB domain-containing protein 17 isoform X1  | 23.2 | 1.3 | ZBTB      |
| Zfp746  | zinc finger protein 746 isoform X10                          | 23.2 | 1.9 | zf-C2H2   |
| Hmg20a  | high mobility group protein 20A isoform X1                   | 23.1 | 2.1 | HMG       |
| Zbtb24  | zinc finger and BTB domain-containing protein 24 isoform 3   | 23.1 | 3.5 | ZBTB      |
| Foxm1   | forkhead box protein M1                                      | 22.9 | 3.2 | Fork head |
| Zscan25 | zinc finger and SCAN domain-containing protein 25 isoform X3 | 22.7 | 3.1 | zf-C2H2   |
| E4f1    | transcription factor E4F1 1                                  | 22.6 | 0.5 | zf-C2H2   |
| Zfp217  | zinc finger protein 217 isoform X2                           | 22.6 | 2.9 | zf-C2H2   |
| Zfp26   | zinc finger protein 26 isoform X4                            | 22.6 | 1.2 | zf-C2H2   |
| Gatad2b | transcriptional repressor p66-beta isoform X2                | 22.5 | 8   | zf-GATA   |
| Zfp213  | zinc finger protein 213                                      | 22.5 | 1.9 | zf-C2H2   |
| Bach1   | transcription regulator protein BACH1 isoform X1             | 22.4 | 1.7 | TF_bZIP   |
| Zfp281  | zinc finger protein 281                                      | 22.3 | 1.1 | zf-C2H2   |
| Mybl2   | myb-related protein B isoform X4                             | 22.0 | 1.6 | MYB       |
| Zfp768  | zinc finger protein 768                                      | 21.8 | 1.3 | zf-C2H2   |
| Zfp282  | zinc finger protein 282 isoform X1                           | 21.4 | 1.5 | zf-C2H2   |
| Atf1    | cyclic AMP-dependent transcription factor ATF-1 isoform X1   | 21.3 | 2   | TF_bZIP   |
| Id1     | DNA-binding protein inhibitor ID-1 isoform X1                | 21.3 | 9   | bHLH      |
| Usf2    | upstream stimulatory factor 2 isoform X2                     | 21.3 | 0.6 | bHLH      |
| Zfp672  | zinc finger protein 672 isoform X1                           | 21.3 | 0.7 | zf-C2H2   |
| E2f1    | transcription factor E2F1 isoform b precursor                | 21.2 | 2.9 | E2F       |
| Foxp4   | forkhead box protein P4 isoform 2                            | 21.2 | 2.8 | Fork head |
| Repin1  | replication initiator 1 isoform d                            | 21.2 | 1.7 | zf-C2H2   |

|         |                                                                |      |     |           |
|---------|----------------------------------------------------------------|------|-----|-----------|
| Deaf1   | deformed epidermal autoregulatory factor 1 homolog isoform X11 | 21.1 | 2.9 | SAND      |
| Zfp810  | zinc finger protein 157 isoform X2                             | 21.1 | 0.5 | zf-C2H2   |
| Foxc1   | forkhead box protein C1                                        | 21.0 | 4.3 | Fork head |
| Tead4   | transcriptional enhancer factor TEF-3 isoform b                | 21.0 | 1.5 | TEA       |
| Ubp1    | upstream-binding protein 1 isoform a                           | 21.0 | 1.5 | CP2       |
| Zfp787  | zinc finger protein 787 isoform X3                             | 21.0 | 1.3 | zf-C2H2   |
| Mga     | MAX gene-associated protein isoform X2                         | 20.9 | 1.8 | T-box     |
| Zbtb6   | zinc finger and BTB domain-containing protein 6                | 20.8 | 0.9 | ZBTB      |
| Zfp1    | zinc finger protein 1 isoform X1                               | 20.8 | 3.3 | zf-C2H2   |
| Zfp777  | zinc finger protein 777 isoform X4                             | 20.8 | 0.9 | zf-C2H2   |
| Zfp942  | uncharacterized protein LOC73233                               | 20.8 | 3.2 | zf-C2H2   |
| Nr1d2   | nuclear receptor subfamily 1 group D member 2                  | 20.6 | 2.8 | THR-like  |
| Zbtb38  | zinc finger and BTB domain-containing protein 38 isoform X2    | 20.4 | 4.4 | ZBTB      |
| Arid1b  | AT-rich interactive domain-containing protein 1B isoform X2    | 20.3 | 1.6 | ARID      |
| Zfp605  | zinc finger protein 605                                        | 20.3 | 3.3 | zf-C2H2   |
| Ttf1    | transcription termination factor 1 isoform X2                  | 20.2 | 1.2 | MYB       |
| Cic     | protein capicua homolog isoform X2                             | 20.1 | 5   | HMG       |
| Mier3   | mesoderm induction early response protein 3 isoform X3         | 20.1 | 0.9 | MYB       |
| Gzf1    | GDNF-inducible zinc finger protein 1 isoform X2                | 20.0 | 1.1 | ZBTB      |
| Tfeb    | transcription factor EB isoform X1                             | 19.9 | 2.5 | bHLH      |
| Zkscan8 | zinc finger protein with KRAB and SCAN domains 8 isoform 3     | 19.8 | 3.2 | zf-C2H2   |
| Zfp180  | zinc finger protein 180 isoform X1                             | 19.6 | 1.6 | zf-C2H2   |
| E2f8    | transcription factor E2F8 isoform X1                           | 19.5 | 3.4 | E2F       |
| Ovo1    | putative transcription factor Ovo-like 1 isoform X2            | 19.5 | 0.6 | zf-C2H2   |

|         |                                                             |      |     |           |
|---------|-------------------------------------------------------------|------|-----|-----------|
| Tada2a  | transcriptional adapter 2-alpha isoform X3                  | 19.5 | 1.1 | MYB       |
| Zfp800  | zinc finger protein 800 isoform X1                          | 19.5 | 1.3 | zf-C2H2   |
| Tfcp2   | alpha-globin transcription factor CP2 isoform X5            | 19.4 | 1.5 | CP2       |
| Zfp516  | zinc finger protein 516 isoform X1                          | 19.4 | 3.2 | zf-C2H2   |
| Zfp943  | uncharacterized protein LOC74670                            | 19.4 | 2.4 | zf-C2H2   |
| Hmgxb3  | HMG domain-containing protein 3 isoform X1                  | 19.3 | 1   | HMG       |
| Tsc22d2 | TSC22 domain family protein 2 isoform X3                    | 19.3 | 4   | TSC22     |
| Zfp143  | zinc finger protein 143                                     | 19.3 | 0.9 | zf-C2H2   |
| Zfp629  | zinc finger protein 629 isoform X2                          | 19.3 | 1.9 | zf-C2H2   |
| Zbtb44  | zinc finger and BTB domain-containing protein 44 isoform X3 | 19.2 | 2.6 | ZBTB      |
| Tulp4   | tubby-related protein 4 isoform b                           | 19.1 | 5.8 | Tub       |
| Zfp618  | zinc finger protein 618 isoform X9                          | 18.9 | 3   | zf-C2H2   |
| Emx2    | homeobox protein EMX2 isoform X1                            | 18.7 | 3.9 | Homeobox  |
| Tfap4   | transcription factor AP-4 isoform X1                        | 18.6 | 3.1 | bHLH      |
| Zfp868  | Kruppel-like zinc finger protein isoform X1                 | 18.6 | 2.4 | zf-C2H2   |
| Foxj3   | forkhead box protein J3 isoform X1                          | 18.5 | 1   | Fork head |
| Gli3    | transcriptional activator GLI3 isoform X2                   | 18.5 | 2.3 | zf-C2H2   |
| Rlf     | zinc finger protein Rlf isoform X2                          | 18.5 | 1.5 | zf-C2H2   |
| Zkscan6 | zinc finger protein 18 isoform X2                           | 18.5 | 1.6 | zf-C2H2   |
| Etv3    | ETS translocation variant 3 isoform X1                      | 18.4 | 1.4 | ETS       |
| Etv6    | transcription factor ETV6 isoform X1                        | 18.4 | 2.7 | ETS       |
| Tgif2   | homeobox protein TGIF2 isoform X1                           | 18.4 | 0.8 | Homeobox  |
| Zfp408  | zinc finger protein 408 isoform X2                          | 18.4 | 0.6 | zf-C2H2   |
| Arid1a  | AT-rich interactive domain-containing protein 1A            | 18.2 | 6.8 | ARID      |

|             |                                                                |      |     |          |
|-------------|----------------------------------------------------------------|------|-----|----------|
| Mef2d       | myocyte-specific enhancer factor 2D isoform X4                 | 18.2 | 3   | SRF      |
| Zbtb43      | zinc finger and BTB domain-containing protein 43 isoform X2    | 18.2 | 1   | ZBTB     |
| Mlxip       | MLX-interacting protein isoform 2                              | 18.1 | 5.9 | bHLH     |
| Zfp707      | zinc finger protein 707 isoform X1                             | 18.1 | 2.1 | zf-C2H2  |
| Zfp961      | uncharacterized protein LOC234413 isoform X1                   | 18.1 | 3   | zf-C2H2  |
| 610008E11Ri | uncharacterized protein LOC72128 isoform X2                    | 18.0 | 2   | zf-C2H2  |
| Stat5b      | signal transducer and activator of transcription 5B isoform X1 | 18.0 | 2.8 | STAT     |
| Zfp949      | uncharacterized protein LOC71640 isoform X1                    | 18.0 | 1.4 | zf-C2H2  |
| Pknx1       | homeobox protein PKNOX1 isoform X3                             | 17.9 | 1.4 | Homeobox |
| Zfp422      | zinc finger protein 22                                         | 17.9 | 0.7 | zf-C2H2  |
| Zbtb21      | zinc finger and BTB domain-containing protein 21 isoform X1    | 17.7 | 1.3 | ZBTB     |
| Zbtb12      | zinc finger and BTB domain-containing protein 12 isoform X1    | 17.5 | 1.3 | ZBTB     |
| Zfp524      | zinc finger protein 524                                        | 17.5 | 0.5 | zf-C2H2  |
| Zmiz2       | zinc finger MIZ domain-containing protein 2 isoform X5         | 17.5 | 3.1 | zf-MIZ   |
| Lcor        | ligand-dependent corepressor isoform X2                        | 17.4 | 2.7 | HTH      |
| Zfp160      | zinc finger protein 160                                        | 17.4 | 1.7 | zf-C2H2  |
| Znf512b     | zinc finger protein 512B                                       | 17.2 | 4.9 | zf-C2H2  |
| Zscan12     | zinc finger and SCAN domain-containing protein 12 isoform X1   | 17.2 | 1.2 | zf-C2H2  |
| Zfp507      | zinc finger protein 507 isoform X2                             | 17.1 | 1.1 | zf-C2H2  |
| Zbtb14      | zinc finger and BTB domain-containing protein 14 isoform X1    | 17.0 | 0.7 | ZBTB     |
| Zfp322a     | zinc finger protein 322                                        | 17.0 | 2.7 | zf-C2H2  |
| Tfe3        | transcription factor E3 isoform X2                             | 16.9 | 1.3 | bHLH     |
| Mxi1        | max-interacting protein 1 isoform X3                           | 16.8 | 1.7 | bHLH     |
| Sim1        | single-minded homolog 1 isoform X6                             | 16.7 | 1.2 | bHLH     |

|            |                                                             |      |     |          |
|------------|-------------------------------------------------------------|------|-----|----------|
| Thap3      | THAP domain-containing protein 3 isoform 2                  | 16.7 | 1.3 | THAP     |
| D3Ertd254e | uncharacterized protein LOC241944                           | 16.6 | 1.8 | zf-C2H2  |
| Fos        | proto-oncogene c-Fos                                        | 16.3 | 4.7 | TF_bZIP  |
| Zfp51      | zinc finger protein 51                                      | 16.3 | 0.4 | zf-C2H2  |
| Hoxa10     | homeobox protein Hox-A10 isoform b                          | 16.2 | 2.4 | Homeobox |
| Snopc4     | snRNA-activating protein complex subunit 4 isoform X5       | 16.2 | 1.3 | MYB      |
| Zbtb4      | zinc finger and BTB domain-containing protein 4 isoform X1  | 16.2 | 3   | ZBTB     |
| Zfp12      | zinc finger protein 12 isoform X1                           | 16.2 | 2.2 | zf-C2H2  |
| Zscan2     | zinc finger and SCAN domain-containing protein 2 isoform X1 | 16.2 | 2.7 | zf-C2H2  |
| Pax2       | paired box protein Pax-2 isoform X6                         | 16.1 | 4.4 | PAX      |
| Tfdp2      | transcription factor Dp-2 isoform D                         | 16.1 | 1   | E2F      |
| Six1       | homeobox protein SIX1                                       | 16.0 | 0.9 | Homeobox |
| Zfp212     | zinc finger protein 212 isoform 2                           | 16.0 | 2.8 | zf-C2H2  |
| Zfp688     | zinc finger protein 688 isoform X2                          | 15.9 | 1.2 | zf-C2H2  |
| Etv4       | ETS translocation variant 4 isoform X5                      | 15.8 | 2.1 | ETS      |
| Fosl2      | fos-related antigen 2                                       | 15.8 | 6.9 | TF_bZIP  |
| Sp4        | transcription factor Sp4 isoform X1                         | 15.8 | 1.1 | zf-C2H2  |
| Zfp90      | zinc finger protein 90 isoform X2                           | 15.8 | 3.1 | zf-C2H2  |
| Hsf2       | heat shock factor protein 2 isoform X2                      | 15.7 | 1.9 | HSF      |
| Sox13      | transcription factor SOX-13                                 | 15.7 | 0.9 | HMG      |
| E2f3       | transcription factor E2F3 isoform E2f3a                     | 15.6 | 1.6 | E2F      |
| E2f7       | transcription factor E2F7 isoform X2                        | 15.6 | 1.8 | E2F      |
| Zbtb2      | zinc finger and BTB domain-containing protein 2 isoform X1  | 15.6 | 0.5 | ZBTB     |
| Klf13      | Krüppel-like factor 13                                      | 15.5 | 2.8 | zf-C2H2  |



|          |                                                             |      |     |          |
|----------|-------------------------------------------------------------|------|-----|----------|
| Klf7     | Krüppel-like factor 7 isoform X2                            | 15.5 | 2.5 | zf-C2H2  |
| Nr1i3    | nuclear receptor subfamily 1 group I member 3 isoform 3     | 15.4 | 1.8 | THR-like |
| Zkscan14 | zinc finger protein 394 isoform X1                          | 15.4 | 1.1 | zf-C2H2  |
| Gmeb1    | glucocorticoid modulatory element-binding protein 1         | 15.3 | 0.8 | SAND     |
| Terf2    | telomeric repeat-binding factor 2 isoform 3                 | 15.3 | 1.1 | MYB      |
| Zfp771   | zinc finger protein 771                                     | 15.2 | 1.7 | zf-C2H2  |
| Zfp316   | zinc finger protein 316 isoform X1                          | 15.1 | 1.6 | zf-C2H2  |
| Zfp710   | zinc finger protein 710 isoform X1                          | 15.0 | 1.8 | zf-C2H2  |
| Zfp938   | uncharacterized protein LOC237411 isoform X1                | 15.0 | 2.7 | zf-C2H2  |
| Pms1     | PMS1 protein homolog 1 isoform X1                           | 14.8 | 0.9 | HMG      |
| Rcor3    | REST corepressor 3 isoform X3                               | 14.8 | 1.9 | MYB      |
| Zfp932   | zinc finger protein 431 isoform X3                          | 14.7 | 3.2 | zf-C2H2  |
| Zfp944   | uncharacterized protein LOC319615 isoform X1                | 14.7 | 2.4 | zf-C2H2  |
| Zbtb8a   | zinc finger and BTB domain-containing protein 8A            | 14.6 | 0.5 | ZBTB     |
| Wiz      | protein Wiz isoform X10                                     | 14.5 | 1.6 | zf-C2H2  |
| Rfx2     | DNA-binding protein RFX2 isoform 1                          | 14.3 | 2.1 | RFX      |
| Rfx7     | DNA-binding protein RFX7                                    | 14.3 | 3.9 | RFX      |
| Setdb2   | histone-lysine N-methyltransferase SETDB2 isoform 2         | 14.3 | 1.3 | MBD      |
| Zbtb25   | zinc finger and BTB domain-containing protein 25 isoform X5 | 14.3 | 1.5 | ZBTB     |
| Hoxa9    | homeobox protein Hox-A9 isoform 2                           | 14.1 | 0.9 | Homeobox |
| Smad1    | mothers against decapentaplegic homolog 1 isoform X1        | 14.1 | 0.9 | MH1      |
| Zfp120   | zinc finger protein 120 isoform 2 precursor                 | 14.1 | 1.2 | zf-C2H2  |
| Runx1    | runt-related transcription factor 1 isoform 3               | 13.9 | 3.1 | Runt     |
| Zfp236   | zinc finger protein 236 isoform X8                          | 13.9 | 1.4 | zf-C2H2  |

|          |                                                                              |      |     |         |
|----------|------------------------------------------------------------------------------|------|-----|---------|
| Zfp61    | zinc finger protein 155                                                      | 13.9 | 0.4 | zf-C2H2 |
| Arntl    | aryl hydrocarbon receptor nuclear translocator-like protein 1 isoform X7     | 13.8 | 0.2 | bHLH    |
| Plagl1   | zinc finger protein PLAGL1                                                   | 13.8 | 0.7 | zf-C2H2 |
| Smad7    | mothers against decapentaplegic homolog 7 isoform X1                         | 13.8 | 0.8 | MH1     |
| Dbp      | D site-binding protein isoform X2                                            | 13.7 | 0.9 | TF_bZIP |
| Zfp407   | zinc finger protein 407 isoform X1                                           | 13.7 | 2.7 | zf-C2H2 |
| Zfp865   | zinc finger protein 865 isoform 1                                            | 13.7 | 2   | zf-C2H2 |
| Dnajc1   | dnaJ homolog subfamily C member 1 isoform X1                                 | 13.6 | 1.3 | MYB     |
| Hivep2   | transcription factor HIVEP2 isoform X1                                       | 13.6 | 0.8 | zf-C2H2 |
| Mycn     | N-myc proto-oncogene protein                                                 | 13.6 | 2.1 | bHLH    |
| Nfil3    | nuclear factor interleukin-3-regulated protein                               | 13.6 | 1.5 | TF_bZIP |
| Thap2    | THAP domain-containing protein 2                                             | 13.6 | 1.6 | THAP    |
| Zfp956   | uncharacterized protein LOC101197                                            | 13.6 | 1.3 | zf-C2H2 |
| Tshz1    | teashirt homolog 1                                                           | 13.5 | 1.7 | zf-C2H2 |
| Tada2b   | transcriptional adapter 2-beta                                               | 13.4 | 2.1 | MYB     |
| Zfpm2    | zinc finger protein ZFPM2                                                    | 13.4 | 2.7 | zf-C2H2 |
| Rbak     | RB-associated KRAB zinc finger protein isoform X2                            | 13.3 | 0.3 | zf-C2H2 |
| Zfp568   | zinc finger protein 568 isoform X1                                           | 13.2 | 0.1 | zf-C2H2 |
| Zkscan5  | zinc finger protein with KRAB and SCAN domains 5 isoform X3                  | 13.2 | 0.8 | zf-C2H2 |
| Gtf2ird2 | general transcription factor II-I repeat domain-containing protein 2 isoform | 13.0 | 2.6 | GTF2I   |
| Stat1    | signal transducer and activator of transcription 1 isoform X1                | 13.0 | 0.9 | STAT    |
| Stat5a   | signal transducer and activator of transcription 5A isoform X1               | 13.0 | 2   | STAT    |
| Zbed4    | zinc finger BED domain-containing protein 4 isoform X1                       | 13.0 | 1.2 | zf-BED  |
| E2f6     | transcription factor E2F6 isoform X3                                         | 12.9 | 5.1 | E2F     |

|        |                                                             |      |     |           |
|--------|-------------------------------------------------------------|------|-----|-----------|
| Fosl1  | fos-related antigen 1                                       | 12.9 | 1.1 | TF_bZIP   |
| Zfp41  | zinc finger protein 41 isoform X1                           | 12.9 | 0.8 | zf-C2H2   |
| Zfp574 | zinc finger protein 574 isoform X2                          | 12.9 | 1.2 | zf-C2H2   |
| Zfp867 | zinc finger protein 867 isoform X1                          | 12.9 | 0.8 | zf-C2H2   |
| Zfp101 | zinc finger protein 101                                     | 12.8 | 2.9 | zf-C2H2   |
| Zfp319 | zinc finger protein 319                                     | 12.6 | 2.9 | zf-C2H2   |
| Zfp597 | zinc finger protein 597 isoform X1                          | 12.6 | 0.3 | zf-C2H2   |
| Zfp697 | zinc finger protein 697 isoform X3                          | 12.6 | 1.9 | zf-C2H2   |
| Grhl1  | grainyhead-like protein 1 homolog isoform X3                | 12.5 | 2.4 | CP2       |
| Zfp592 | zinc finger protein 592                                     | 12.5 | 1.1 | zf-C2H2   |
| Zfp946 | zinc finger protein 946 isoform b                           | 12.5 | 1.9 | zf-C2H2   |
| Rnf138 | E3 ubiquitin-protein ligase RNF138 isoform X1               | 12.4 | 0.4 | zf-MIZ    |
| Zbtb37 | zinc finger and BTB domain-containing protein 37 isoform X1 | 12.3 | 1.7 | ZBTB      |
| Foxo4  | forkhead box protein O4 isoform X1                          | 12.2 | 1   | Fork head |
| Nfe2l3 | nuclear factor erythroid 2-related factor 3                 | 12.2 | 2.6 | TF_bZIP   |
| Nfic   | nuclear factor 1 C-type isoform X1                          | 12.2 | 2.6 | CTF/NFI   |
| Plagl2 | zinc finger protein PLAGL2                                  | 12.2 | 1.6 | zf-C2H2   |
| Zfp113 | zinc finger protein 3                                       | 12.2 | 1   | zf-C2H2   |
| Zfp748 | zinc finger protein 748                                     | 12.2 | 0.4 | zf-C2H2   |
| Sp6    | transcription factor Sp6 isoform X1                         | 12.1 | 1.2 | zf-C2H2   |
| Zbtb26 | zinc finger and BTB domain-containing protein 26            | 12.1 | 0.5 | ZBTB      |
| Zfp54  | zinc finger protein 54                                      | 12.1 | 1.3 | zf-C2H2   |
| Zfp954 | uncharacterized protein LOC232853                           | 12.1 | 0.3 | zf-C2H2   |
| Foxp1  | forkhead box protein P1 isoform X6                          | 12.0 | 1.6 | Fork head |

|        |                                                              |      |     |            |
|--------|--------------------------------------------------------------|------|-----|------------|
| Rfx5   | DNA-binding protein Rfx5 isoform X2                          | 12.0 | 0.7 | RFX        |
| Zfp526 | zinc finger protein 526 isoform X2                           | 11.9 | 1.2 | zf-C2H2    |
| Zfp110 | neurotrophin receptor-interacting factor 1 isoform X1        | 11.8 | 1.9 | zf-C2H2    |
| Zfp606 | zinc finger protein 606 isoform X1                           | 11.8 | 0.9 | zf-C2H2    |
| Zfp617 | zinc finger protein 617                                      | 11.8 | 1.4 | zf-C2H2    |
| Zfp654 | zinc finger protein 654 isoform X4                           | 11.8 | 1.7 | zf-C2H2    |
| Zfp808 | zinc finger protein 80 isoform X2                            | 11.8 | 0.8 | zf-C2H2    |
| Zfp715 | zinc finger protein 715 isoform X2                           | 11.7 | 0.8 | zf-C2H2    |
| Foxk1  | forkhead box protein K1                                      | 11.6 | 3.9 | Fork head  |
| Irf8   | interferon regulatory factor 8                               | 11.6 | 1.1 | IRF        |
| Hoxa5  | homeobox protein Hox-A5                                      | 11.5 | 1.6 | Homeobox   |
| Hoxb8  | homeobox protein Hox-B8 isoform X1                           | 11.5 | 1.1 | Homeobox   |
| Nfatc4 | nuclear factor of activated T-cells, cytoplasmic 4 isoform 2 | 11.5 | 3.9 | RHD        |
| Zfp157 | zinc finger protein 157 isoform X3                           | 11.4 | 1.4 | zf-C2H2    |
| Zfp324 | zinc finger protein 324A isoform X2                          | 11.4 | 1.4 | zf-C2H2    |
| Zfp653 | zinc finger protein 653 isoform 2                            | 11.4 | 1.6 | zf-C2H2    |
| Mysm1  | histone H2A deubiquitinase MYSM1                             | 11.3 | 0.8 | MYB        |
| Nr4a1  | nuclear receptor subfamily 4 group A member 1                | 11.3 | 3   | NGFIB-like |
| Rbpj   | recombining binding protein suppressor of hairless isoform 2 | 11.2 | 1.2 | CSL        |
| Sall2  | sal-like protein 2 isoform 2                                 | 11.2 | 3   | zf-C2H2    |
| Tcf7l2 | transcription factor 7-like 2 isoform 18                     | 11.2 | 1.8 | HMG        |
| Foxa1  | hepatocyte nuclear factor 3-alpha isoform X1                 | 11.1 | 2.3 | Fork head  |
| Irf2   | interferon regulatory factor 2 isoform X2                    | 11.1 | 2   | IRF        |
| Zfp369 | neurotrophin receptor-interacting factor 2                   | 11.1 | 0.9 | zf-C2H2    |

|        |                                                                      |      |     |           |
|--------|----------------------------------------------------------------------|------|-----|-----------|
| Zfp758 | zinc finger protein 758 isoform X2                                   | 11.1 | 2   | zf-C2H2   |
| Prdm15 | PR domain zinc finger protein 15 isoform X5                          | 11.0 | 1   | zf-C2H2   |
| Zfp87  | zinc finger protein 87                                               | 11.0 | 1.6 | zf-C2H2   |
| Arid3a | AT-rich interactive domain-containing protein 3A isoform X1          | 10.9 | 1.2 | ARID      |
| Relb   | transcription factor RelB isoform X1                                 | 10.9 | 0.9 | RHD       |
| Tead1  | transcriptional enhancer factor TEF-1 isoform X7                     | 10.9 | 6.8 | TEA       |
| Lcor1  | ligand-dependent nuclear receptor corepressor-like protein isoform 1 | 10.8 | 2.6 | HTH       |
| Zfp46  | zinc finger protein 436 isoform X1                                   | 10.8 | 0.4 | zf-C2H2   |
| Zfp719 | zinc finger protein 719 isoform X1                                   | 10.8 | 0.9 | zf-C2H2   |
| Smad6  | mothers against decapentaplegic homolog 6 isoform X1                 | 10.7 | 2.1 | MH1       |
| Zfp275 | zinc finger protein 275 isoform X1                                   | 10.6 | 2.8 | zf-C2H2   |
| Pou2f1 | POU domain, class 2, transcription factor 1 isoform X2               | 10.4 | 1.9 | Pou       |
| Tfap2a | transcription factor AP-2-alpha isoform 1                            | 10.4 | 2.1 | AP-2      |
| Mbd4   | methyl-CpG-binding domain protein 4                                  | 10.3 | 0.1 | MBD       |
| Pou6f1 | POU domain, class 6, transcription factor 1 isoform X7               | 10.3 | 1.7 | Pou       |
| Stat2  | signal transducer and activator of transcription 2 isoform X3        | 10.3 | 1.9 | STAT      |
| Zfp37  | zinc finger protein 37 isoform X2                                    | 10.3 | 0.9 | zf-C2H2   |
| Elf4   | ETS-related transcription factor Elf-4                               | 10.2 | 2.7 | ETS       |
| Homez  | homeobox and leucine zipper protein Homez isoform X4                 | 10.2 | 1.4 | Homeobox  |
| Zfp65  | zinc finger protein 71, related sequence                             | 10.2 | 0.6 | zf-C2H2   |
| Mecp2  | methyl-CpG-binding protein 2 isoform 1                               | 10.1 | 1.5 | MBD       |
| Arid5b | AT-rich interactive domain-containing protein 5B isoform X4          | 10.0 | 3.3 | ARID      |
| Foxj2  | forkhead box protein J2                                              | 10.0 | 0.9 | Fork head |
| Zfp472 | zinc finger protein 472                                              | 10.0 | 0.6 | zf-C2H2   |

|         |                                                              |      |     |           |
|---------|--------------------------------------------------------------|------|-----|-----------|
| Zfp668  | zinc finger protein 668 isoform X1                           | 10.0 | 1.4 | zf-C2H2   |
| Plag1   | zinc finger protein PLAG1 isoform X1                         | 9.9  | 0.9 | zf-C2H2   |
| Zfp35   | zinc finger protein 271                                      | 9.9  | 1.6 | zf-C2H2   |
| Mybl1   | myb-related protein A isoform X3                             | 9.8  | 1.6 | MYB       |
| Zbtb16  | zinc finger and BTB domain-containing protein 16 isoform X1  | 9.8  | 1.9 | ZBTB      |
| Zfp846  | zinc finger protein 846                                      | 9.6  | 0.6 | zf-C2H2   |
| Zscan22 | zinc finger and SCAN domain-containing protein 22 isoform a  | 9.6  | 1.4 | zf-C2H2   |
| Atf7    | cyclic AMP-dependent transcription factor ATF-7 isoform 1    | 9.5  | 2   | TF_bZIP   |
| Foxo1   | forkhead box protein O1                                      | 9.5  | 1.4 | Fork head |
| Gmeb2   | glucocorticoid modulatory element-binding protein 2          | 9.5  | 0.7 | SAND      |
| Jarid2  | protein Jumonji isoform X3                                   | 9.5  | 0.5 | ARID      |
| Mxd1    | max dimerization protein 1 isoform X1                        | 9.5  | 1.9 | bHLH      |
| Rere    | arginine-glutamic acid dipeptide repeats protein isoform X10 | 9.5  | 3.6 | zf-GATA   |
| Zfp790  | zinc finger protein 790 isoform X1                           | 9.5  | 0.3 | zf-C2H2   |
| Zfhx3   | zinc finger homeobox protein 3                               | 9.4  | 3.1 | Homeobox  |
| Zfp444  | zinc finger protein 444 isoform X1                           | 9.4  | 0.9 | zf-C2H2   |
| Zscan29 | zinc finger and SCAN domain-containing protein 29 isoform X1 | 9.4  | 1.2 | zf-C2H2   |
| Sox12   | transcription factor SOX-12                                  | 9.3  | 1.2 | HMG       |
| Zfp229  | zinc finger protein 229                                      | 9.2  | 1.6 | zf-C2H2   |
| Zfp764  | zinc finger protein 764 isoform 2                            | 9.2  | 0.7 | zf-C2H2   |
| Elk1    | ETS domain-containing protein Elk-1                          | 9.1  | 0.2 | ETS       |
| Nr2f2   | COUP transcription factor 2 isoform 2                        | 9.1  | 1.7 | RXR-like  |
| Meis2   | homeobox protein Meis2 isoform 15                            | 9.0  | 1   | Homeobox  |
| Prdm2   | PR domain zinc finger protein 2 isoform a                    | 9.0  | 1.6 | zf-C2H2   |

|        |                                                             |     |     |           |
|--------|-------------------------------------------------------------|-----|-----|-----------|
| Zfp27  | zinc finger protein 27 isoform X1                           | 9.0 | 0.1 | zf-C2H2   |
| Zbtb45 | zinc finger and BTB domain-containing protein 45 isoform X1 | 8.9 | 1.3 | ZBTB      |
| Zfp169 | zinc finger protein 169 isoform X1                          | 8.9 | 1.3 | zf-C2H2   |
| Rfx1   | MHC class II regulatory factor RFX1 isoform X1              | 8.7 | 1.4 | RFX       |
| Rreb1  | ras-responsive element-binding protein 1 isoform 2          | 8.7 | 1.7 | zf-C2H2   |
| Zfat   | zinc finger protein ZFAT isoform X3                         | 8.7 | 1.6 | zf-C2H2   |
| Zfp788 | zinc finger protein 788 isoform X4                          | 8.7 | 0.5 | zf-C2H2   |
| Irx2   | iroquois-class homeodomain protein IRX-2                    | 8.6 | 1.4 | Homeobox  |
| Meis3  | homeobox protein Meis3 isoform b                            | 8.6 | 3.4 | Homeobox  |
| Six5   | homeobox protein SIX5 isoform X1                            | 8.6 | 0.5 | Homeobox  |
| Zbtb39 | zinc finger and BTB domain-containing protein 39            | 8.6 | 1.2 | ZBTB      |
| Zfp398 | zinc finger protein 398 isoform X2                          | 8.6 | 0.5 | zf-C2H2   |
| Ebf4   | transcription factor COE4                                   | 8.5 | 2.7 | COE       |
| Foxn2  | forkhead box protein N2 isoform X2                          | 8.5 | 1   | Fork head |
| Zfp184 | zinc finger protein 184 isoform X2                          | 8.5 | 1.6 | zf-C2H2   |
| Zfp58  | zinc finger protein 58                                      | 8.4 | 1.5 | zf-C2H2   |
| Zfpm1  | zinc finger protein ZFPM1                                   | 8.4 | 2.5 | zf-C2H2   |
| Zbtb48 | zinc finger and BTB domain-containing protein 48 isoform X3 | 8.3 | 0.5 | ZBTB      |
| Zfp142 | zinc finger protein 142 isoform X3                          | 8.3 | 0.9 | zf-C2H2   |
| Zfp599 | zinc finger-like protein isoform X1                         | 8.3 | 0.1 | zf-C2H2   |
| Zmiz1  | zinc finger MIZ domain-containing protein 1 isoform X1      | 8.3 | 4.8 | zf-MIZ    |
| Tulp3  | tubby-related protein 3 isoform X1                          | 8.2 | 1.9 | Tub       |
| Zfp579 | zinc finger protein 579                                     | 8.2 | 0.5 | zf-C2H2   |
| Zbtb32 | zinc finger and BTB domain-containing protein 32            | 8.1 | 2   | ZBTB      |

|             |                                                             |     |     |          |
|-------------|-------------------------------------------------------------|-----|-----|----------|
| Ikzf2       | zinc finger protein Helios isoform X6                       | 8.0 | 1.6 | zf-C2H2  |
| Zfp560      | zinc finger protein 778                                     | 8.0 | 1   | zf-C2H2  |
| Zfp442      | zinc finger protein 442 isoform X2                          | 7.8 | 0.8 | zf-C2H2  |
| Zfp729a     | zinc finger protein 729a                                    | 7.8 | 0.9 | zf-C2H2  |
| Zfp729b     | zinc finger protein 729b                                    | 7.8 | 0.3 | zf-C2H2  |
| Zkscan7     | zinc finger protein with KRAB and SCAN domains 7 isoform X2 | 7.8 | 0.4 | zf-C2H2  |
| Hivep1      | zinc finger protein 40                                      | 7.6 | 1.5 | zf-C2H2  |
| Zbtb49      | zinc finger and BTB domain-containing protein 49            | 7.6 | 1.4 | ZBTB     |
| Zfp874a     | zinc finger protein 874 isoform X1                          | 7.6 | 1.2 | zf-C2H2  |
| Zfp964      | zinc finger-like protein isoform X1                         | 7.6 | 1.1 | zf-C2H2  |
| Zfp362      | zinc finger protein 362                                     | 7.5 | 1.5 | zf-C2H2  |
| 130023H24Ri | GLI-Kruppel family member GLI4                              | 7.4 | 0.3 | zf-C2H2  |
| Prdm10      | PR domain zinc finger protein 10 isoform X7                 | 7.4 | 1.4 | zf-C2H2  |
| Cers6       | ceramide synthase 6 isoform X2                              | 7.3 | 3   | Homeobox |
| Mnt         | max-binding protein MNT isoform X2                          | 7.3 | 0.9 | bHLH     |
| Zfp827      | zinc finger protein 827 isoform X12                         | 7.3 | 1.7 | zf-C2H2  |
| Tcf4        | transcription factor 4                                      | 7.2 | 1.8 | bHLH     |
| Zfp760      | zinc finger protein 760                                     | 7.1 | 0.6 | zf-C2H2  |
| Myb         | transcriptional activator Myb isoform 1                     | 7.0 | 1.1 | MYB      |
| Ncor2       | nuclear receptor corepressor 2 isoform X23                  | 7.0 | 3.4 | MYB      |
| Zfp458      | zinc finger protein 728 isoform X2                          | 7.0 | 1.9 | zf-C2H2  |
| Zfp933      | uncharacterized protein LOC242747 isoform X1                | 6.9 | 0.9 | zf-C2H2  |
| Zbtb40      | zinc finger and BTB domain-containing protein 40 isoform X2 | 6.8 | 0.6 | ZBTB     |
| Zfp661      | zinc finger protein 2                                       | 6.8 | 0.5 | zf-C2H2  |



|             |                                                                 |     |     |           |
|-------------|-----------------------------------------------------------------|-----|-----|-----------|
| Nfix        | nuclear factor 1 X-type isoform X8                              | 6.7 | 2.8 | CTF/NFI   |
| Ppard       | peroxisome proliferator-activated receptor delta                | 6.7 | 1.1 | THR-like  |
| Sp8         | transcription factor Sp8 isoform X2                             | 6.7 | 0.9 | zf-C2H2   |
| Ovol2       | transcription factor Ovo-like 2 isoform X1                      | 6.6 | 0.8 | zf-C2H2   |
| Rcor2       | REST corepressor 2 isoform X1                                   | 6.6 | 1   | MYB       |
| Mtf1        | metal regulatory transcription factor 1                         | 6.5 | 0.4 | zf-C2H2   |
| Zfp738      | zinc finger protein 738 isoform X2                              | 6.5 | 0.3 | zf-C2H2   |
| AW146154    | uncharacterized protein LOC101835                               | 6.3 | 0.9 | zf-C2H2   |
| Rsl1        | regulator of sex limited protein 1                              | 6.3 | 0.8 | zf-C2H2   |
| Zfp691      | zinc finger protein 691                                         | 6.3 | 0.6 | zf-C2H2   |
| Zfp747      | zinc finger protein 747                                         | 6.3 | 0.3 | zf-C2H2   |
| Zfp770      | zinc finger protein 770 isoform X1                              | 6.3 | 0.4 | zf-C2H2   |
| 430033K04Ri | uncharacterized protein LOC243308                               | 6.2 | 1.1 | zf-C2H2   |
| Dmrta2      | doublesex- and mab-3-related transcription factor A2 isoform X1 | 6.2 | 0.3 | DM        |
| Prdm5       | PR domain zinc finger protein 5                                 | 6.2 | 0.5 | zf-C2H2   |
| Sp2         | transcription factor Sp2 isoform 2                              | 6.2 | 1.8 | zf-C2H2   |
| Tbx3        | T-box transcription factor TBX3 isoform X1                      | 6.1 | 1.9 | T-box     |
| Zfp111      | zinc finger protein 111 isoform 2                               | 6.1 | 0.3 | zf-C2H2   |
| Nr6a1       | nuclear receptor subfamily 6 group A member 1 isoform 3         | 6.0 | 0.3 | GCNF-like |
| Zbtb3       | zinc finger and BTB domain-containing protein 3 isoform X2      | 6.0 | 0.4 | ZBTB      |
| Zfp39       | zinc finger protein 39                                          | 6.0 | 0.8 | zf-C2H2   |
| Zfp3        | zinc finger protein 3                                           | 5.9 | 0.6 | zf-C2H2   |
| Zfp784      | zinc finger protein 784                                         | 5.8 | 1.2 | zf-C2H2   |
| Nfatc2      | nuclear factor of activated T-cells, cytoplasmic 2 isoform e    | 5.7 | 2.1 | RHD       |

|        |                                                             |     |     |          |
|--------|-------------------------------------------------------------|-----|-----|----------|
| Pbx4   | pre-B-cell leukemia transcription factor 4                  | 5.7 | 1.6 | Homeobox |
| Zbtb8b | zinc finger and BTB domain-containing protein 8B isoform X1 | 5.7 | 0.2 | ZBTB     |
| Zfp651 | zinc finger and BTB domain-containing protein 47 isoform X1 | 5.7 | 2   | ZBTB     |
| Zfp74  | zinc finger protein 569 isoform X1                          | 5.7 | 0.6 | zf-C2H2  |
| Klf2   | Krueppel-like factor 2                                      | 5.6 | 0.8 | zf-C2H2  |
| Sox6   | transcription factor SOX-6 isoform 4                        | 5.6 | 2.3 | HMG      |
| Tcf7l1 | transcription factor 7-like 1 isoform 1                     | 5.6 | 1.5 | HMG      |
| Zfp11  | zinc finger protein 11                                      | 5.6 | 0.5 | zf-C2H2  |
| Zfp947 | zinc finger protein 947                                     | 5.6 | 1   | zf-C2H2  |
| Osr1   | protein odd-skipped-related 1                               | 5.5 | 0.5 | zf-C2H2  |
| Prox2  | prospero homeobox protein 2 isoform X2                      | 5.5 | 0.9 | HPD      |
| Zfp429 | zinc finger protein 429                                     | 5.5 | 0.3 | zf-C2H2  |
| Zfp382 | zinc finger protein 382 isoform X3                          | 5.4 | 1   | zf-C2H2  |
| Nr1d1  | nuclear receptor subfamily 1 group D member 1               | 5.3 | 1.2 | THR-like |
| Zfp791 | zinc finger protein 791 isoform X1                          | 5.3 | 1.5 | zf-C2H2  |
| Camta2 | calmodulin-binding transcription activator 2 isoform 4      | 5.2 | 0.9 | CG-1     |
| Dmrt2  | doublesex- and mab-3-related transcription factor 2         | 5.2 | 0.9 | DM       |
| Irf7   | interferon regulatory factor 7 isoform X1                   | 5.2 | 0.7 | IRF      |
| Barx2  | homeobox protein BarH-like 2                                | 5.1 | 1.7 | Homeobox |
| Rfx3   | transcription factor RFX3 isoform X3                        | 5.1 | 1.4 | RFX      |
| Egr2   | E3 SUMO-protein ligase EGR2                                 | 5.0 | 1.4 | zf-C2H2  |
| Zfp763 | zinc finger protein 763                                     | 5.0 | 1.6 | zf-C2H2  |
| Zfp94  | zinc finger protein 45 isoform X1                           | 5.0 | 0.7 | zf-C2H2  |
| Zfp628 | zinc finger protein 628                                     | 4.9 | 0.1 | zf-C2H2  |

|         |                                                              |     |     |           |
|---------|--------------------------------------------------------------|-----|-----|-----------|
| Zfp772  | zinc finger protein 419                                      | 4.9 | 0.3 | zf-C2H2   |
| Zfp57   | zinc finger protein 57 isoform 2                             | 4.8 | 1.1 | zf-C2H2   |
| Zfp820  | zinc finger protein 820                                      | 4.8 | 0.5 | zf-C2H2   |
| Zfp952  | uncharacterized protein LOC240067 isoform X1                 | 4.8 | 0.8 | zf-C2H2   |
| Zhx2    | zinc fingers and homeoboxes protein 2 isoform X1             | 4.7 | 0.5 | Homeobox  |
| Gm14305 | predicted gene, 100043387                                    | 4.6 | 0.2 | zf-C2H2   |
| Hic2    | hypermethylated in cancer 2 protein                          | 4.6 | 0.9 | ZBTB      |
| Zfp13   | zinc finger protein 13                                       | 4.6 | 0.7 | zf-C2H2   |
| Zfp72   | zinc finger protein 72 isoform X2                            | 4.5 | 0.5 | zf-C2H2   |
| Zfp874b | zinc finger protein 874b isoform X2                          | 4.5 | 0.5 | zf-C2H2   |
| Eomes   | eomesodermin homolog isoform X1                              | 4.3 | 0.3 | T-box     |
| Foxp3   | forkhead box protein P3                                      | 4.3 | 0.1 | Fork head |
| Zfp296  | zinc finger protein 296                                      | 4.3 | 1   | zf-C2H2   |
| Zfp595  | zinc finger protein 595 isoform X2                           | 4.3 | 0.5 | zf-C2H2   |
| Zfp40   | zinc finger protein 40 isoform X3                            | 4.2 | 0.6 | zf-C2H2   |
| Zfp473  | zinc finger protein 473 homolog isoform X3                   | 4.2 | 0.7 | zf-C2H2   |
| Zfp708  | zinc finger protein 708 isoform d                            | 4.2 | 0.5 | zf-C2H2   |
| Hoxa3   | homeobox protein Hox-A3 isoform X1                           | 4.1 | 0.5 | Homeobox  |
| Otx1    | homeobox protein OTX1 isoform X1                             | 4.1 | 0.9 | TF_Otx    |
| Zfp248  | zinc finger protein 248 isoform X2                           | 4.0 | 0.7 | zf-C2H2   |
| Zfp953  | zinc finger protein 953                                      | 4.0 | 0.6 | zf-C2H2   |
| Zscan20 | zinc finger and SCAN domain-containing protein 20 isoform X5 | 4.0 | 0.1 | zf-C2H2   |
| Zbtb34  | zinc finger and BTB domain-containing protein 34 isoform X2  | 3.9 | 0.5 | ZBTB      |
| Zfp273  | zinc finger protein 273                                      | 3.9 | 0.3 | zf-C2H2   |

|          |                                                                |     |     |          |
|----------|----------------------------------------------------------------|-----|-----|----------|
| Zfp551   | zinc finger protein 551                                        | 3.9 | 0.5 | zf-C2H2  |
| Zfp677   | KRAB-zinc finger protein                                       | 3.9 | 0.4 | zf-C2H2  |
| Prdm9    | histone-lysine N-methyltransferase<br>PRDM9 isoform X1         | 3.8 | 0.7 | zf-C2H2  |
| Zfp945   | uncharacterized protein LOC240041<br>isoform X1                | 3.7 | 0.2 | zf-C2H2  |
| Nr3c2    | mineralocorticoid receptor                                     | 3.6 | 1.1 | ESR-like |
| Zfp141   | zinc finger protein 141 isoform 1                              | 3.6 | 0.2 | zf-C2H2  |
| Zfp85    | zinc finger protein 85                                         | 3.6 | 0.6 | zf-C2H2  |
| Crem     | cAMP-responsive element modulator<br>isoform 16                | 3.5 | 1.1 | TF_bZIP  |
| Zfp82    | zinc finger protein 82 isoform 3                               | 3.5 | 1.2 | zf-C2H2  |
| Zfp963   | zinc finger protein 669-like                                   | 3.5 | 0.5 | zf-C2H2  |
| Bhlhe41  | class E basic helix-loop-helix protein<br>41 isoform 2         | 3.4 | 0.2 | bHLH     |
| Zfp128   | zinc finger protein 8                                          | 3.4 | 0.6 | zf-C2H2  |
| Zfp189   | zinc finger protein 189                                        | 3.4 | 1.1 | zf-C2H2  |
| Zfp418   | zinc finger protein 418                                        | 3.4 | 0.3 | zf-C2H2  |
| Zfp566   | zinc finger protein 566                                        | 3.4 | 0.8 | zf-C2H2  |
| BC025920 | cDNA sequence BC025920                                         | 3.3 | 0.5 | zf-C2H2  |
| Esr1     | estrogen receptor isoform 1                                    | 3.3 | 0.7 | ESR-like |
| Ybx2     | Y-box-binding protein 2 isoform X5                             | 3.3 | 1.4 | CSD      |
| Zfp939   | zinc finger protein 939 isoform X4                             | 3.3 | 0.5 | zf-C2H2  |
| Zfp960   | zinc finger protein 960 isoform 2                              | 3.3 | 0.8 | zf-C2H2  |
| Arid5a   | AT-rich interactive domain-containing<br>protein 5A isoform X1 | 3.2 | 0.5 | ARID     |
| Rel      | proto-oncogene c-Rel                                           | 3.2 | 0.6 | RHD      |
| Tal1     | T-cell acute lymphocytic leukemia<br>protein 1 homolog         | 3.2 | 1.4 | bHLH     |
| Zfp759   | zinc finger protein 759 isoform X1                             | 3.2 | 0.6 | zf-C2H2  |

|        |                                                                          |     |     |            |
|--------|--------------------------------------------------------------------------|-----|-----|------------|
| Cux2   | homeobox protein cut-like 2 isoform X6                                   | 3.1 | 0.4 | CUT        |
| Nfatc1 | nuclear factor of activated T-cells, cytoplasmic 1 isoform 5             | 3.1 | 0.7 | RHD        |
| Twist1 | twist-related protein 1                                                  | 3.1 | 2.2 | bHLH       |
| Zfp420 | zinc finger protein 420 isoform X1                                       | 3.0 | 0.7 | zf-C2H2    |
| Gm5595 | predicted gene 5595                                                      | 2.9 | 0.2 | zf-C2H2    |
| Arntl2 | aryl hydrocarbon receptor nuclear translocator-like protein 2 isoform X1 | 2.8 | 0.7 | bHLH       |
| Sox9   | transcription factor SOX-9                                               | 2.8 | 0.3 | HMG        |
| Zfhx2  | zinc finger homeobox protein 2 isoform X3                                | 2.8 | 0.8 | Homeobox   |
| Zfp329 | zinc finger protein 329 isoform X2                                       | 2.8 | 0.3 | zf-C2H2    |
| Zfp341 | zinc finger protein 341 isoform X1                                       | 2.8 | 0.6 | zf-C2H2    |
| Zfp775 | zinc finger protein 775 isoform X1                                       | 2.8 | 0.5 | zf-C2H2    |
| Zfp174 | zinc finger protein 174 isoform X1                                       | 2.7 | 0.4 | zf-C2H2    |
| Zfp455 | zinc finger protein 455                                                  | 2.7 | 0.3 | zf-C2H2    |
| Dlx1   | homeobox protein DLX-1 isoform X1                                        | 2.6 | 0.9 | Homeobox   |
| Yy2    | transcription factor YY2                                                 | 2.6 | 0.3 | zf-C2H2    |
| Nr4a2  | nuclear receptor subfamily 4 group A member 2                            | 2.5 | 0.3 | NGFIB-like |
| E2f2   | transcription factor E2F2 isoform 2                                      | 2.4 | 0.2 | E2F        |
| Etv5   | ETS translocation variant 5 isoform X1                                   | 2.4 | 0.4 | ETS        |
| Zbtb46 | zinc finger and BTB domain-containing protein 46 isoform X3              | 2.4 | 1.5 | ZBTB       |
| Zfhx4  | zinc finger homeobox protein 4 isoform X1                                | 2.4 | 0.8 | Homeobox   |
| Zfp28  | zinc finger protein 28                                                   | 2.3 | 0.4 | zf-C2H2    |
| Zfp446 | zinc finger protein 446 isoform X2                                       | 2.3 | 0.6 | zf-C2H2    |
| Zxdb   | zinc finger X-linked protein ZXDB                                        | 2.3 | 0.2 | zf-C2H2    |
| Tbx2   | T-box transcription factor TBX2                                          | 2.2 | 0.6 | T-box      |

|             |                                                          |     |     |            |
|-------------|----------------------------------------------------------|-----|-----|------------|
| Zfp202      | zinc finger protein 202 isoform X3                       | 2.2 | 0.2 | zf-C2H2    |
| Zik1        | zinc finger protein interacting with ribonucleoprotein K | 2.2 | 0.2 | zf-C2H2    |
| 130019O22Ri | RIKEN cDNA 9130019O22 gene                               | 2.1 | 0.2 | zf-C2H2    |
| Mycl        | protein L-Myc isoform X1                                 | 2.1 | 0.2 | bHLH       |
| Pax9        | paired box protein Pax-9 isoform X1                      | 2.1 | 0.9 | PAX        |
| Zfp97       | zinc finger protein 97                                   | 2.1 | 0.5 | zf-C2H2    |
| Myt1l       | myelin transcription factor 1-like protein isoform 3     | 2.0 | 1.4 | zf-C2HC    |
| Tcf24       | transcription factor 24 isoform X1                       | 2.0 | 0.5 | bHLH       |
| Zfp658      | zinc finger protein 658 isoform X1                       | 2.0 | 0.3 | zf-C2H2    |
| Zfp456      | zinc finger protein 456                                  | 1.9 | 0.1 | zf-C2H2    |
| Zfp712      | zinc finger protein 712                                  | 1.9 | 0.5 | zf-C2H2    |
| Gata2       | endothelial transcription factor GATA-2                  | 1.6 | 1.5 | zf-GATA    |
| Gata4       | transcription factor GATA-4 isoform 1                    | 1.5 | 1.2 | zf-GATA    |
| Vdr         | vitamin D3 receptor                                      | 1.5 | 0.5 | THR-like   |
| Satb2       | DNA-binding protein SATB2                                | 1.4 | 0.2 | CUT        |
| Gm13251     | predicted gene 13251                                     | 1.3 | 0.3 | zf-C2H2    |
| Myrf        | myelin regulatory factor isoform X2                      | 1.3 | 0.4 | NDT80/PhoG |
| Prdm8       | PR domain zinc finger protein 8 isoform X1               | 1.3 | 0.3 | zf-C2H2    |
| Zfp941      | uncharacterized protein LOC407812                        | 1.3 | 1.1 | zf-C2H2    |
| Rora        | nuclear receptor ROR-alpha isoform X4                    | 1.1 | 0.4 | THR-like   |
| Zfp619      | zinc finger protein 91                                   | 1.1 | 0.2 | zf-C2H2    |
| Camta1      | calmodulin-binding transcription activator 1 isoform 3   | 1.0 | 0.1 | CG-1       |
| Nfia        | nuclear factor 1 A-type isoform X5                       | 1.0 | 0.5 | CTF/NFI    |
